# Supplementary material
Source: PubMed Central journal article supplement (PMC7613218)
Supplement: EMS145175-supplement-Supplement.pdf [file EMS145175-supplement-Supplement.pdf]

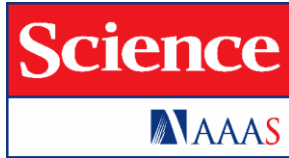

Supplementary Materials for  
**Neutrophilic inflammation in the respiratory mucosa  
predisposes to RSV infection**

Maximillian S. Habibi\*, Ryan S. Thwaites\*, Meiping Chang, Agnieszka Jozwik, Allan Paras,  
Freja Kirsebom, Augusto Varese, Amber Owen, Leah Cuthbertson, Phillip James,  
Tanushree Tunstall, David Nickle, Trevor T. Hansel, Miriam F. Moffatt, Cecilia Johansson‡,  
Christopher Chiu†‡, Peter J. M. Openshaw†‡

\*These authors contributed equally to this work.

†These authors contributed equally to this work.

‡Corresponding author. Email: p.openshaw@imperial.ac.uk (P.J.M.O.);  
c.chiu@imperial.ac.uk (C.C.); c.johansson@imperial.ac.uk (C.J.)

Published 9 October 2020, *Science* **370**, eaax9301 (2020)

DOI: 10.1126/science.aax9301

**This PDF file includes:**

Material and Methods (Tables of Reagents)

Figs. S1 to S9

Tables S1 to S14

**Other Supplementary Material for this manuscript includes the following:**  
(available at [science.sciencemag.org/content/370/6513/eaax9301/suppl/DC1](https://science.sciencemag.org/content/370/6513/eaax9301/suppl/DC1))

MDAR Reproducibility Checklist (PDF)

## Materials and Methods

### Flow cytometry reagents for murine studies

| Target             | Clone or order number    | Fluorochrome | Vendor                | Final concentration and dilution |
|--------------------|--------------------------|--------------|-----------------------|----------------------------------|
| Live cells         | L34957                   | Aqua         | Invitrogen            | 1:500                            |
| CD3                | 17A2                     | AF700        | eBioscience           | 2 mg/ml                          |
| CD3                | 145-2C11                 | FITC         | Biolegend             | 2.5 mg/ml                        |
| CD4                | GK1.5                    | PE           | eBioscience           | 0.5 mg/ml                        |
| CD8                | 53-6.7                   | eFluor780    | eBioscience           | 0.5 mg/ml                        |
| CD11b              | M1/70                    | AF700        | eBioscience           | 0.5 mg/ml                        |
| CD11c              | HL3                      | PE-CF594     | BD Horizon            | 1 mg/ml                          |
| CD19               | 6D5                      | FITC         | Biolegend             | 5 mg/ml                          |
| CD44               | IM7                      | PE-Cy7       | Biolegend             | 2 mg/ml                          |
| CD45               | 30-F11                   | BV605        | Biolegend             | 0.25 mg/ml                       |
| CD62L              | MEL-14                   | BV421        | Biolegend             | 1 mg/ml                          |
| CD64               | X54-5/7                  | APC          | Biolegend             | 1 mg/ml                          |
| CD69               | H1.2F3                   | BUV737       | BD Horizon            | 1 mg/ml                          |
| CD103              | 2E7                      | PerCP-Cy5.5  | Biolegend             | 1 mg/ml                          |
| Fc block (CD16/32) | 93                       |              | Biolegend             | 2.5 mg/ml                        |
| Granzyme B         | GB11                     | PECF594      | BD Horizon            | 1:200                            |
| IFN- $\gamma$      | XMG1.2                   | BV711        | BD Horizon            | 1 mg/ml                          |
| Ly6C               | HK1.4                    | BV421        | Biolegend             | 0.125 mg/ml                      |
| Ly6C               | HK1.4                    | eFluor450    | eBioscience           | 0.25 mg/ml                       |
| Ly6G               | 1A8                      | FITC         | Biolegend             | 5 mg/ml                          |
| Ly6G               | 1A8                      | APC-Cy7      | Biolegend             | 0.5 mg/ml                        |
| Ly6G               | 1A8                      | BV785        | Biolegend             | 1 mg/ml                          |
| MHC-II             | M5/114.15.2              | APC-eF780    | eBiosciences          | 1 mg/ml                          |
| Siglec-F           | E50-2440                 | PE           | BD Pharmingen         | 1 mg/ml                          |
| Tetramer           | RSV M <sub>187-195</sub> | Alexa647     | NIH Tetramer facility | 15 mg/ml                         |

qPCR reagents for murine studies

| <b>Gene</b>   | <b>Primer/Probe</b>                                                                                                                           | <b>Assay ID or order number</b> | <b>Vendor</b>                               |
|---------------|-----------------------------------------------------------------------------------------------------------------------------------------------|---------------------------------|---------------------------------------------|
| <i>Ccl2</i>   | TaqMan® Gene Expression Assay                                                                                                                 | Mm00441242_m1<br>FAM            | Thermo Fisher (ABI)                         |
| <i>Cxcl2</i>  | TaqMan® Gene Expression Assay                                                                                                                 | Mm00436450_m1<br>FAM            | Thermo Fisher (ABI)                         |
| <i>Cxcl10</i> | TaqMan® Gene Expression Assay                                                                                                                 | Mm00445235_m1<br>FAM            | Thermo Fisher (ABI)                         |
| <i>Gapdh</i>  | TaqMan® Gene Expression Assay                                                                                                                 | 4351309<br>VIC                  | Thermo Fisher (ABI)                         |
| <i>Il1b</i>   | TaqMan® Gene Expression Assay                                                                                                                 | Mm00434228_m1<br>FAM            | Thermo Fisher (ABI)                         |
| L gene        | Fwd: 5'-<br>gaactcagtgtaggtagaatgtttgca-3'<br>Rev: 5'-ttcagctatcattttctctgccaat-3'<br>Probe: 5'-(FAM)tttgaacctgtct<br>gaacattcccgggtt(TAM)-3' | Previously<br>reported (65)     | Invitrogen<br><br>Invitrogen<br>Eurofin     |
| <i>Tnfa</i>   | Fwd: 5'-catcttctcaaaattcgagtgacaa-<br>3'<br>Rev: 5'-tgggagtagacaaggtacaaccc-<br>3'<br>Probe:5'-(FAM)cacgtcgtagcaaac<br>(TAM)-3'               | Previously<br>reported (64)     | Invitrogen<br><br>Invitrogen<br><br>Eurofin |

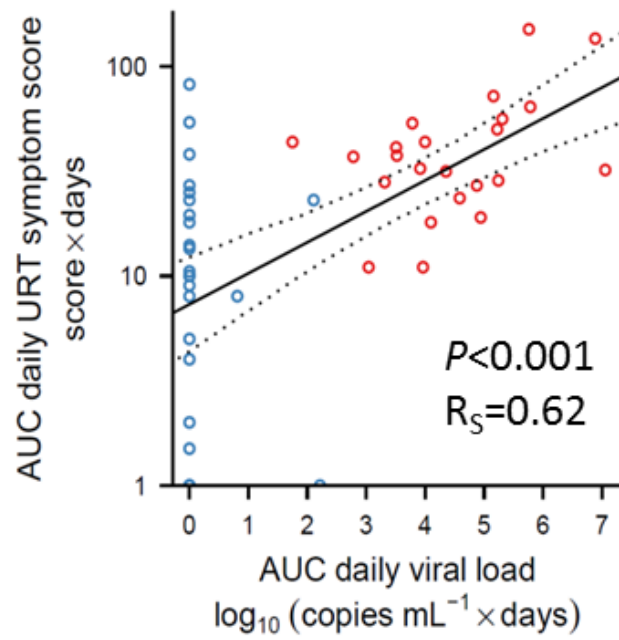

**Fig. S1: Correlation between total upper respiratory tract symptom scores and viral load.**

Correlation between area under the curve (AUC) of upper respiratory tract (URT) symptoms and AUC of daily viral load within the “Cold” (red, n=23) and “No Cold” (blue, n=25) groups was assessed using Spearman’s test.

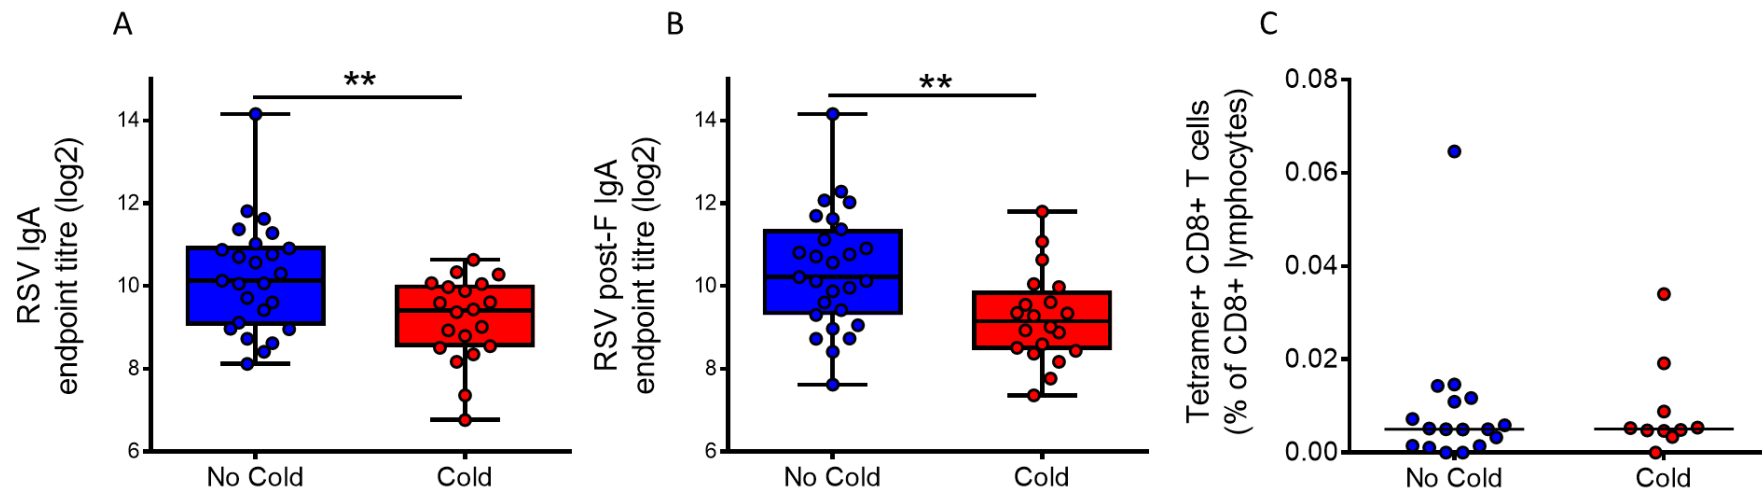

**Fig. S2: Pre-inoculation nasal anti-RSV antibody levels, but not anti-RSV CD8<sup>+</sup> T cell proportions, are associated with protection from infection.**

Baseline levels of (A) total anti-RSV IgA and (B) post-F specific IgA in nasal lavage from “No Cold” (n=25, blue) and “Cold” (n=20, red) groups were measured by ELISA. (C) Frequencies of RSV-specific tetramer positive CD8<sup>+</sup>T cells in the lung from “No Cold” (n=17) and “Cold” (n=10) groups were quantified by flow cytometry. Data in panels A and B are represented as medians with interquartile ranges and minimum and maximum values. Data in panel C are represented as medians. Significance was tested by Mann Whitney *U* test. \*\**P*<0.01.

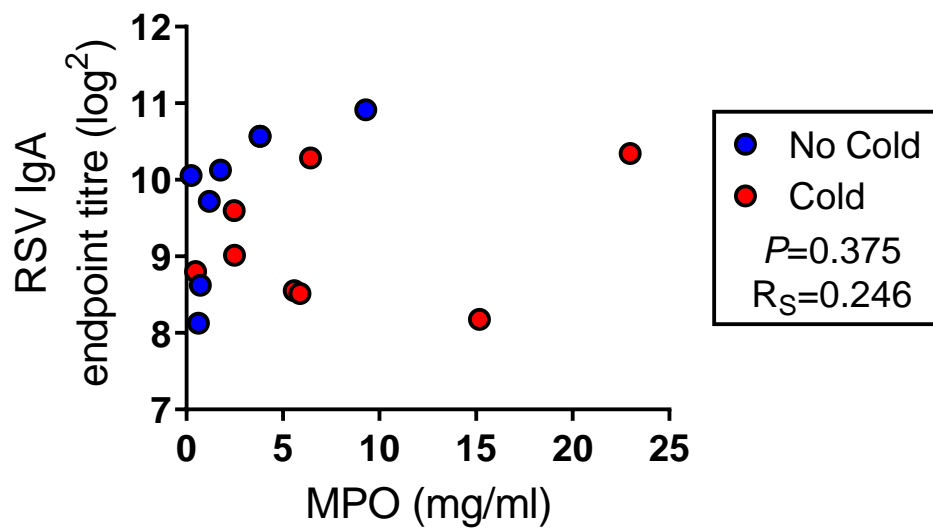

**Fig. S3: Pre-inoculation nasal anti-RSV antibody levels are not associated with measures of neutrophilic inflammation.**

Levels of total anti-RSV IgA and myeloperoxidase (MPO) were measured by ELISA and correlation determined in baseline samples from “No Cold” (n=7) and “Cold” (n=8) groups. Significance was tested in the combined group by Spearman’s test.

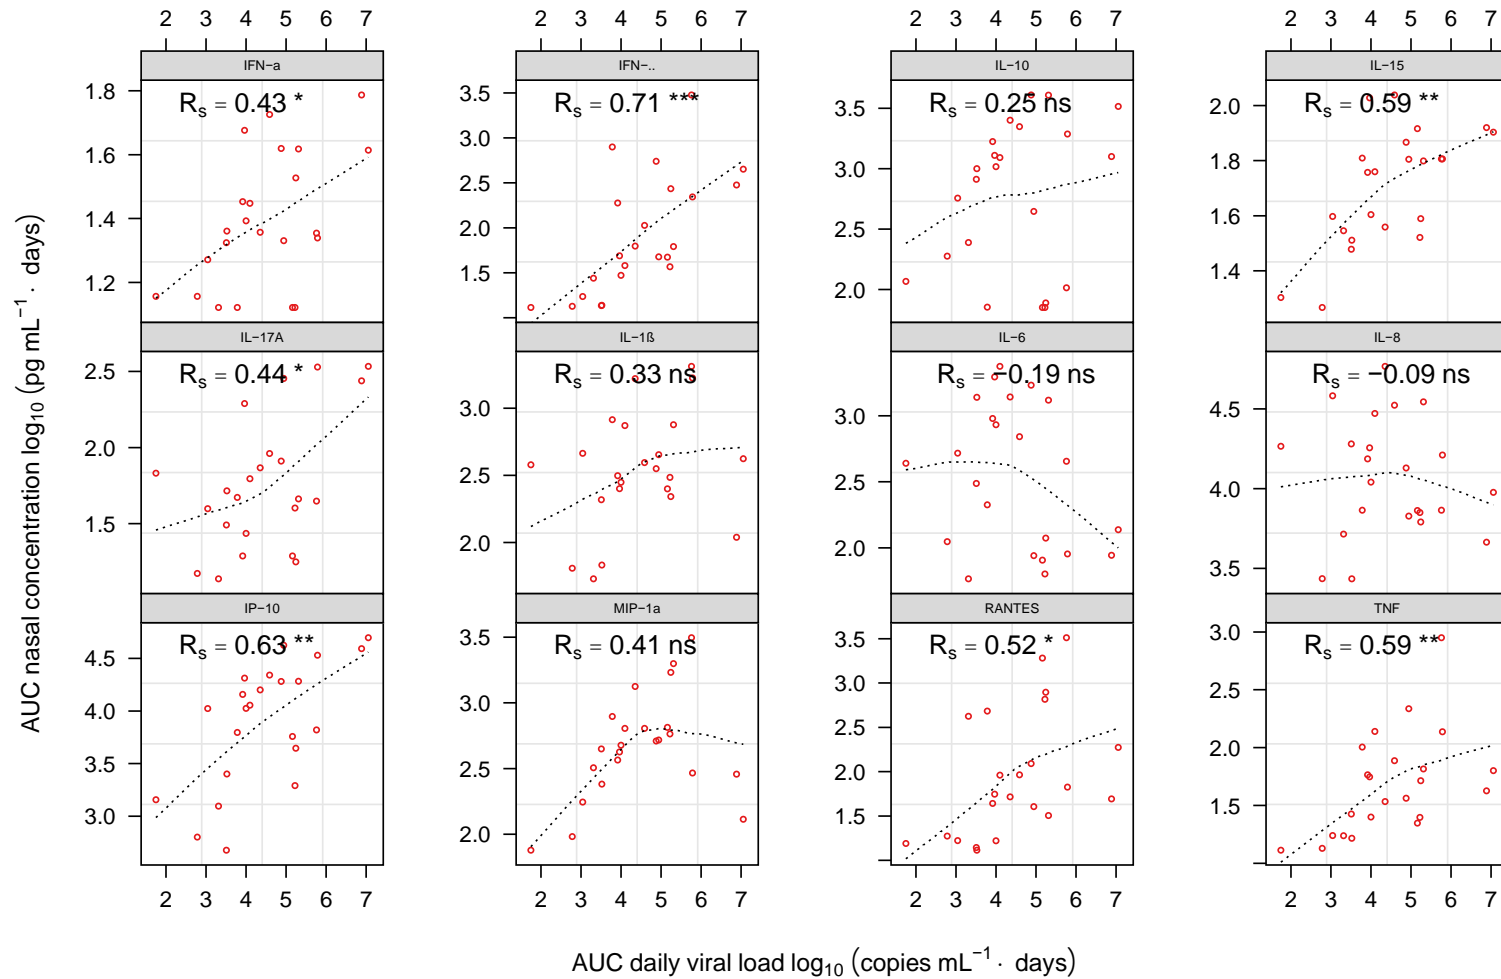

**Fig. S4: Cumulative viral load correlates with the levels of several inflammatory mediators.**

Within the Cold group (n=23), correlations between area under the curve (AUC) levels of daily viral load and cytokine/chemokine mediator levels for (A) IFN- $\alpha$ , (B) IL-17A, (C) CXCL10/IP-10, (D) IFN- $\gamma$ , (E) IL-1 $\beta$ , (F) CCL3/MIP-1 $\alpha$ , (G) IL-10, (H) IL-6, (I) CCL5/RANTES, (J) IL-15, (K) CXCL8/IL-8 and (L) TNF- $\alpha$ . Correlations were assessed using Spearman's test. \* $P$ <0.05, \*\* $P$ <0.01, \*\*\* $P$ <0.001, ns=not significant.

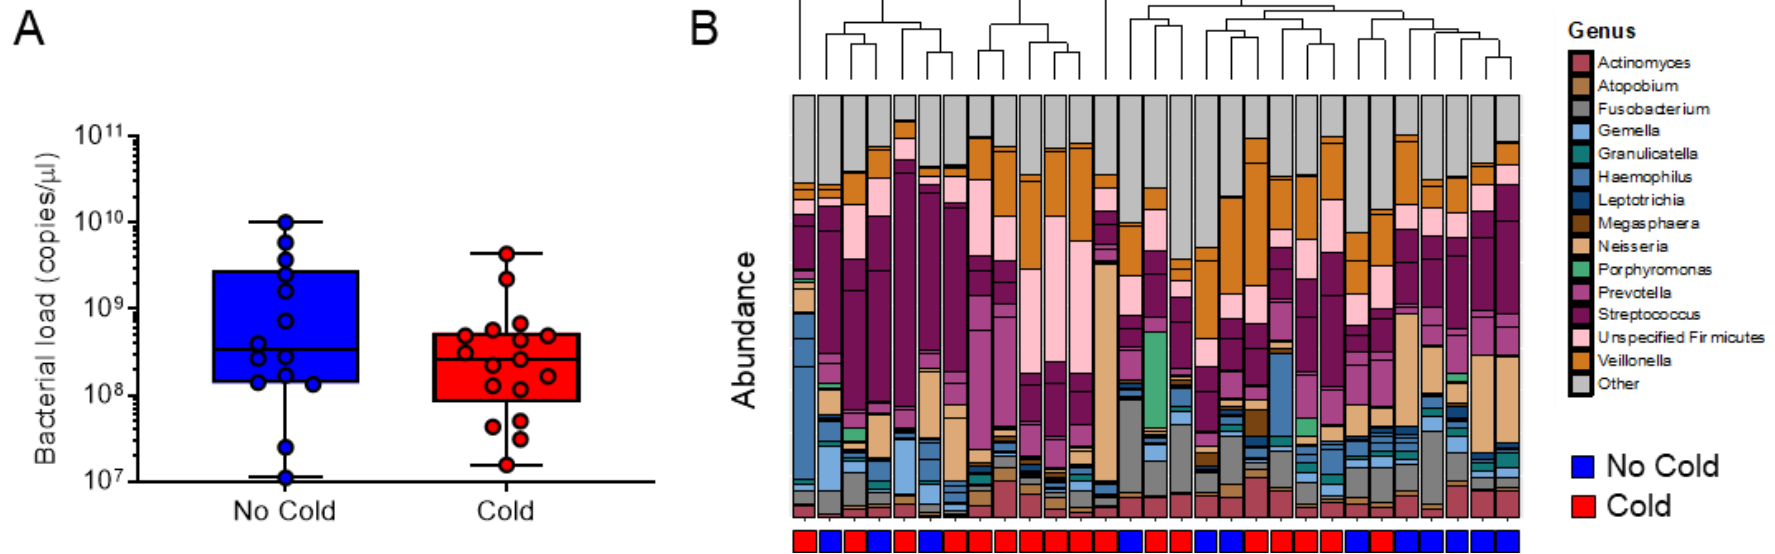

**Fig. S5: The airway microbiome at point of virus exposure is not associated with susceptibility to infection.**

(A) Bacterial load, measured by 16S qPCR, from baseline nasopharyngeal swabs of No Cold (n=12) and Cold (n=17) participants. (B) Baseline bacterial community ordered by Bray-Curtis hierarchical clustering where the top 20 OTUs are shown. Data in part A are represented as median and interquartiles with minimum and maximum values.



**A** Alveolar macrophages, monocytes and neutrophils

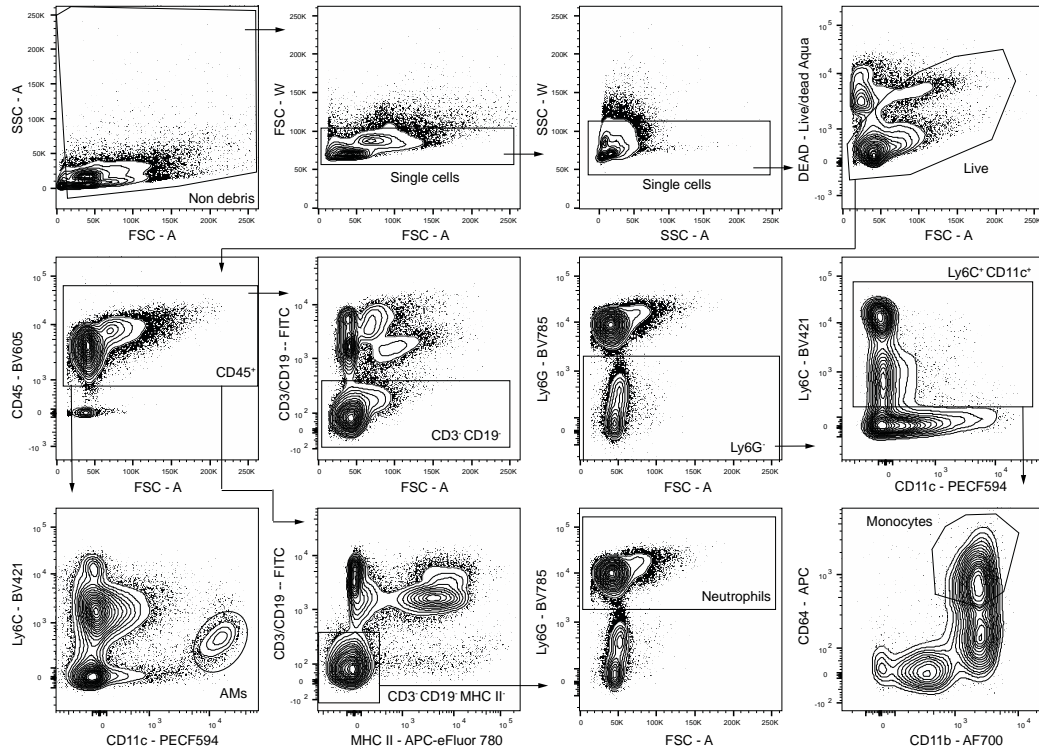

**B** T cell staining panel - Intracellular cytokine stain (gated to live cells as above)

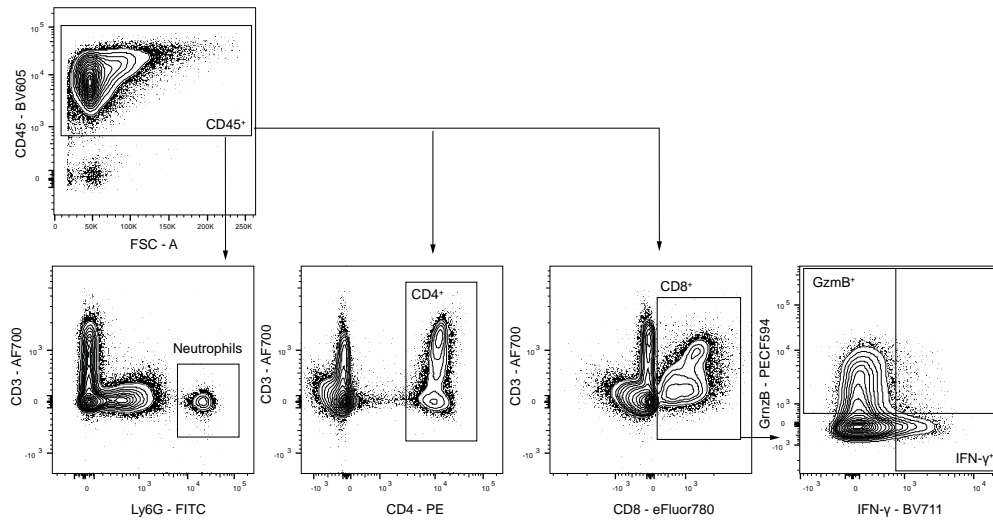

**C** T cell staining panel - CD8<sup>+</sup> tetramer stain (gated to live cells as above)

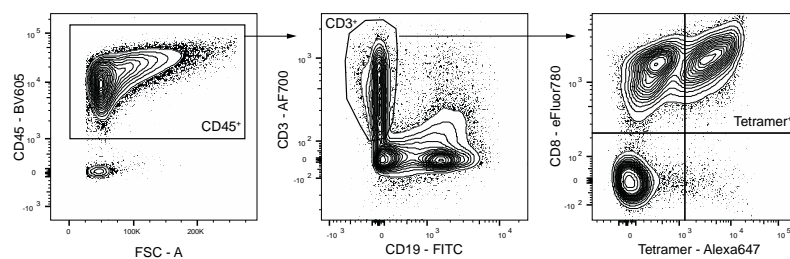

**Fig. S6: Gating strategies for identifying murine lung cells.**

(A) Mice were treated with mock (PBS) or 5-10  $\mu\text{g}$  rCXCL1 i.n.. (A) At 12 hours or 18 hours post-RSV infection airway and lung innate immune cells were obtained by collagenase digestion and stained for the indicated cell surface molecules. After excluding debris and gating on single, live, CD45<sup>+</sup> cells, the depicted gates were used to identify AMs, monocytes, and neutrophils. (B) Mice were treated with mock (PBS) or 10  $\mu\text{g}$  rCXCL1 i.n. and after 12 hours infected with mock (PBS) or  $7.5 \times 10^5$  FFU RSV i.n.. After 8 days, lung cells were obtained by collagenase digestion and stained for the indicated cell surface molecules. After excluding debris and gating on single, live, CD45<sup>+</sup> cells, the depicted gates were used to identify neutrophils, CD4<sup>+</sup> and CD8<sup>+</sup> T cells as well as GzmB<sup>+</sup> and IFN- $\gamma$ <sup>+</sup> CD8<sup>+</sup> T cells. (C) After excluding debris and gating on single, live, CD45<sup>+</sup> cells, the depicted gates were used to identify RSV tetramer<sup>+</sup> CD8<sup>+</sup> T cells.

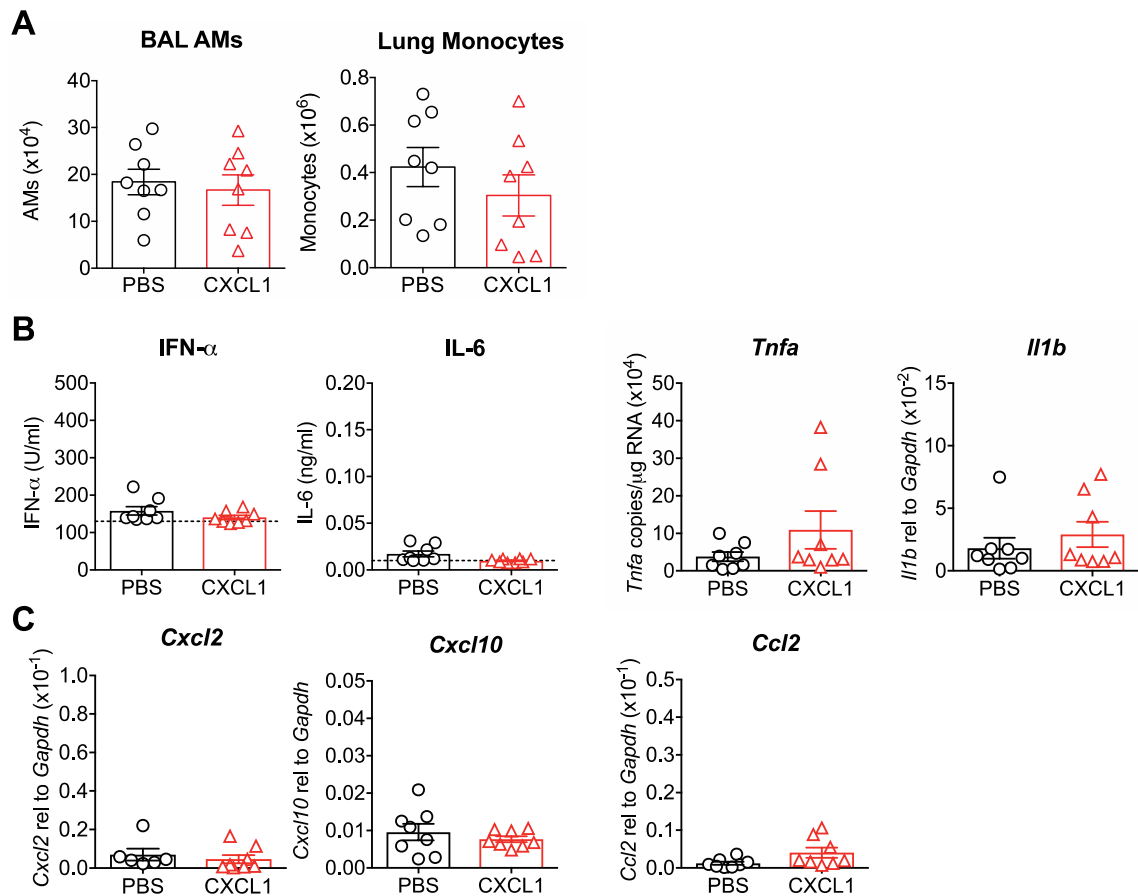

**Fig. S7: Treatment with rCXCL1 alone causes no change in alveolar macrophages, monocytes or inflammatory mediators in the lung.**

Mice were treated with mock (PBS) or 10  $\mu$ g rCXCL1 i.n. and after 12 hours, cells and mediators were quantified in the lung. **(A)** BAL AMs and lung monocytes were quantified 12 hours post CXCL1 treatment by flow cytometry. **(B)** IFN- $\alpha$  and IL-6 was quantified in BAL using ELISA and levels of *Il1b* and *Tnfa* were determined in lung tissue using qPCR. **(C)** *Cxcl2*, *Cxcl10*, and *Ccl2* were determined in lung tissue using qPCR. Data are presented as mean $\pm$ SEM of eight individual mice per group, pooled from two independent experiments. The dotted line represents the limit of detection of the assay. Statistical significance was analyzed using unpaired, two-tailed Student's *t* test.

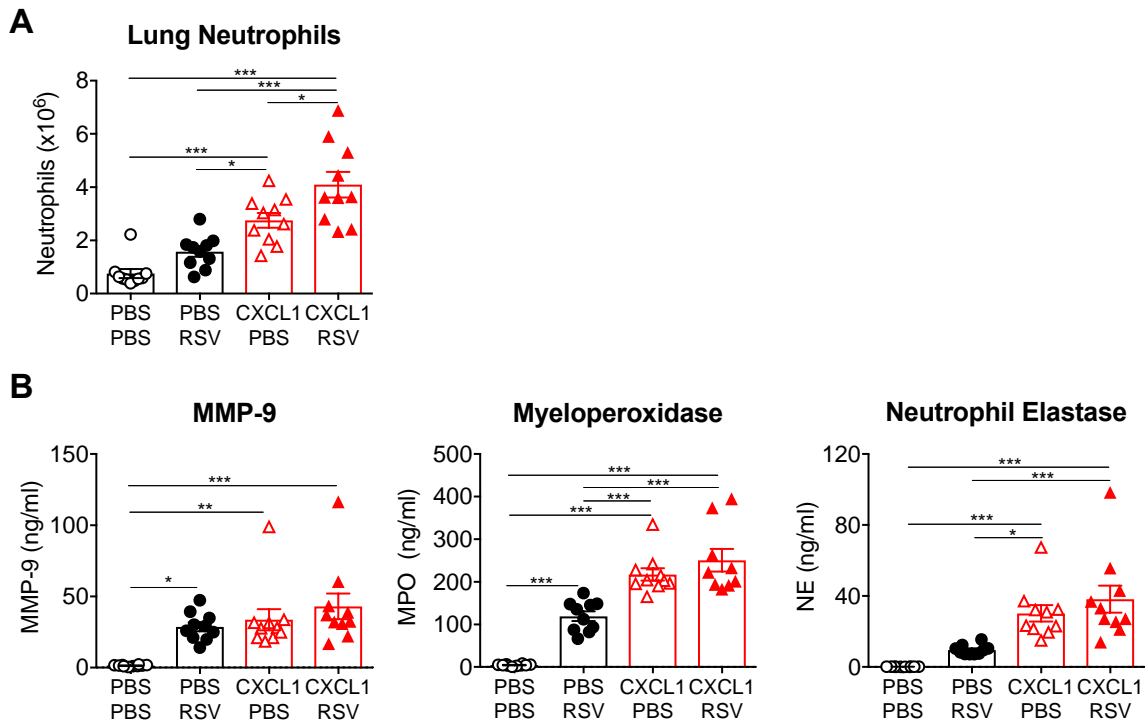

**Fig. S8: RSV infection of rCXCL1 pre-treated mice enhances the early production of neutrophil markers.**

Mice were treated with mock (PBS) or 5  $\mu$ g rCXCL1 i.n. and after 9 hours infected with mock (PBS) or  $7.5 \times 10^5$  FFU RSV i.n. for 18 hours. **(A)** The total number of lung neutrophils was quantified by flow cytometry as previously described in (65). **(B)** MMP-9, MPO and NE was quantified in BAL using ELISA. The data are presented as mean  $\pm$  SEM of 10 individual mice per group, pooled from two independent experiments. Statistical significance of differences was analyzed by one-way ANOVA with Tukey's post hoc test. \* $P < 0.05$ , \*\* $P < 0.01$ , \*\*\* $P < 0.001$ .

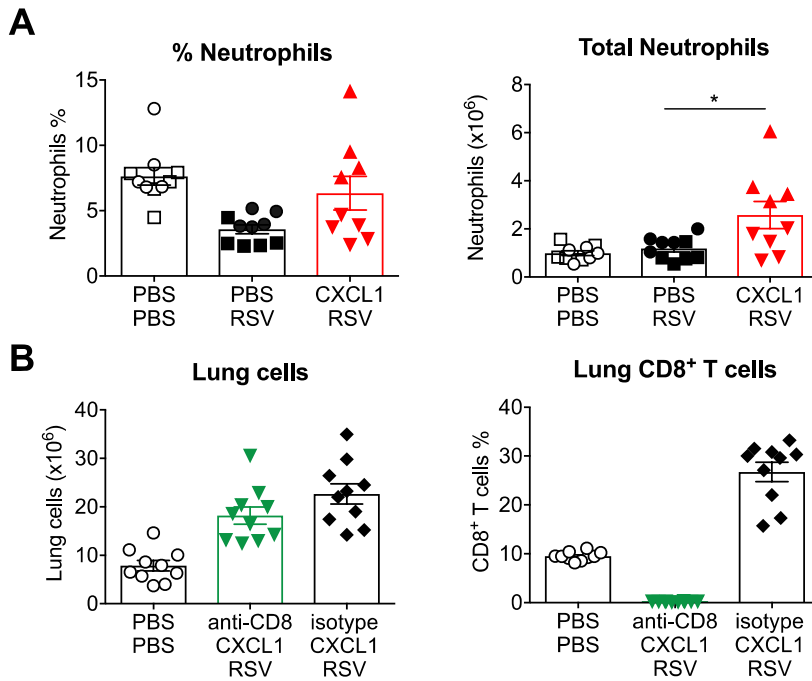

**Fig. S9: Treatment with rCXCL1 pre-RSV infection does not result in an increase in neutrophil frequency on day 8 p.i. and treatment with anti-CD8 antibodies is sufficient to remove CD8<sup>+</sup> T cells during RSV infection.**

Mice were treated with mock (PBS) or 8  $\mu$ g or 10  $\mu$ g rCXCL1 i.n. and after 12 hours infected with mock (PBS) or  $7.5 \times 10^5$  FFU RSV i.n.. **(A)** The frequency and total number of lung neutrophils was quantified by flow cytometry. **(B)** To deplete CD8<sup>+</sup> T cells, mice were treated with 250  $\mu$ g anti-CD8 or isotype control i.p. on day -1, day 2 and day 5 p.i. and lung were analyzed on day 8 p.i.. Total number of lung cells and frequency of CD8<sup>+</sup> T cells as quantified by flow cytometry. Data from **(A)** are presented as mean $\pm$ SEM of 10 (PBS/PBS, PBS/RSV) or 9 (CXCL1/RSV) mice, pooled from two independent experiments - repeat 1 (10  $\mu$ g CXCL1; circles) and repeat 2 (8  $\mu$ g CXCL1; squares). Data from **(B)** are presented as mean $\pm$ SEM of 10 mice, pooled from two independent experiments. Data in **(A and B)** were analyzed using one-way ANOVA with Tukey's post hoc test. \* $P < 0.05$

Table S1

|                            | Cold (n=23)  | No Cold (n=25) | <i>P</i> -value |
|----------------------------|--------------|----------------|-----------------|
| Age in years, mean (range) | 23.3 (18-50) | 23.6 (18-39)   | 0.84            |
| Sex (M:F)                  | 12:11        | 15:10          | 0.77            |
| Ethnicity (n=)             |              |                |                 |
| White                      | 17 (74%)     | 19 (76%)       | >0.99           |
| Black                      | 1 (4%)       | 4 (16%)        | 0.37            |
| Asian                      | 2 (9%)       | 0              | 0.22            |
| Mixed                      | 1 (4%)       | 2 (8%)         | >0.99           |
| Other                      | 2 (9%)       | 0              | 0.22            |

### Table S1: Demographics

Volunteer demographics were collected at study enrolment and categorized on subsequent development of a symptomatic infection following RSV inoculation (Cold, n=23) or not (No Cold, n=25). A two-tailed *t*-test was used to assess significance in volunteer age. Fisher's exact tests were used to assess significance in sex and ethnicity data.

Table S2: Baseline DEGs between “Cold” and “No Cold” groups ( $P_{adj} < 0.1$ ,  $LFC > 0.5$ )

|                 | GeneName           | baseMean    | $\log_2$ FoldChange | lfcSE    | stat     | Pvalue       | Padj      |
|-----------------|--------------------|-------------|---------------------|----------|----------|--------------|-----------|
| ENSG00000129455 | <i>KLK8</i>        | 64.04073471 | 4.50463631          | 0.725538 | 6.208681 | 0.0000000005 | 0.0000078 |
| ENSG00000140519 | <i>RHCG</i>        | 327.2661994 | 3.899687376         | 0.687333 | 5.673651 | 0.0000000140 | 0.0001025 |
| ENSG00000143536 | <i>CRNN</i>        | 717.7315072 | 3.961919136         | 0.710893 | 5.573155 | 0.0000000250 | 0.0001124 |
| ENSG00000136688 | <i>IL36G</i>       | 119.3575404 | 3.485458598         | 0.629406 | 5.537698 | 0.0000000306 | 0.0001124 |
| ENSG00000203785 | <i>SPRR2E</i>      | 549.5597617 | 3.759191643         | 0.694542 | 5.412479 | 0.0000000622 | 0.0001823 |
| ENSG00000244617 | <i>ASPRVI</i>      | 201.6683348 | 2.541982486         | 0.473897 | 5.363995 | 0.0000000814 | 0.0001990 |
| ENSG00000163216 | <i>SPRR2D</i>      | 493.240127  | 3.489918519         | 0.673736 | 5.179946 | 0.0000002219 | 0.0004651 |
| ENSG00000172137 | <i>CALB2</i>       | 7.432513115 | 3.827424619         | 0.744758 | 5.139154 | 0.0000002760 | 0.0005060 |
| ENSG00000102837 | <i>OLFM4</i>       | 9.018542922 | 2.379694573         | 0.485505 | 4.901481 | 0.0000009512 | 0.0015502 |
| ENSG00000164867 | <i>NOS3</i>        | 39.06236907 | 2.172068356         | 0.455328 | 4.770338 | 0.0000018392 | 0.0024524 |
| ENSG00000104327 | <i>CALB1</i>       | 97.2215325  | 3.213472664         | 0.672135 | 4.780991 | 0.0000017443 | 0.0024524 |
| ENSG00000145879 | <i>SPINK7</i>      | 214.5721968 | 3.777459369         | 0.795095 | 4.750953 | 0.0000020246 | 0.0024747 |
| ENSG00000167755 | <i>KLK6</i>        | 219.7775905 | 3.749018528         | 0.793685 | 4.723561 | 0.0000023175 | 0.0026149 |
| ENSG00000143369 | <i>ECM1</i>        | 368.3426926 | 2.548748229         | 0.543078 | 4.693155 | 0.0000026902 | 0.0028186 |
| ENSG00000088386 | <i>SLC15A1</i>     | 58.06521529 | 1.444700757         | 0.309249 | 4.671646 | 0.0000029880 | 0.0029218 |
| ENSG00000167754 | <i>KLK5</i>        | 58.04069283 | 4.183165833         | 0.901151 | 4.642025 | 0.0000034501 | 0.0031629 |
| ENSG00000244094 | <i>SPRR2F</i>      | 174.9314565 | 3.559094351         | 0.769266 | 4.62661  | 0.0000037170 | 0.0032071 |
| ENSG00000197948 | <i>FCHSD1</i>      | 433.0477186 | 0.555918016         | 0.122298 | 4.545597 | 0.0000054780 | 0.0044639 |
| ENSG00000188508 | <i>KRTDAP</i>      | 56.82226766 | 4.12052942          | 0.913535 | 4.510532 | 0.0000064665 | 0.0049922 |
| ENSG00000165799 | <i>RNASE7</i>      | 76.05592952 | 2.591086011         | 0.578846 | 4.476294 | 0.0000075950 | 0.0055702 |
| ENSG00000158825 | <i>CDA</i>         | 31.30464651 | 3.126427907         | 0.70532  | 4.432636 | 0.0000093088 | 0.0060990 |
| ENSG00000172005 | <i>MAL</i>         | 315.8263003 | 2.780102998         | 0.629321 | 4.417623 | 0.0000099792 | 0.0060990 |
| ENSG00000188100 | <i>FAM25A</i>      | 52.79654449 | 3.385115694         | 0.766093 | 4.418675 | 0.0000099308 | 0.0060990 |
| ENSG00000178734 | <i>LMO7DN</i>      | 7.032824408 | 2.363797695         | 0.534435 | 4.422982 | 0.0000097348 | 0.0060990 |
| ENSG00000256618 | <i>MTRNR2L1</i>    | 31.19207611 | 4.405844562         | 1.017059 | 4.331946 | 0.0000147797 | 0.0078477 |
| ENSG00000166396 | <i>SERPINB7</i>    | 133.8826024 | 1.568727074         | 0.362378 | 4.328974 | 0.0000149805 | 0.0078477 |
| ENSG00000105427 | <i>CNFN</i>        | 357.4556348 | 2.628314998         | 0.606082 | 4.336567 | 0.0000144726 | 0.0078477 |
| ENSG00000169035 | <i>KLK7</i>        | 460.4004676 | 3.236932356         | 0.746379 | 4.336849 | 0.0000144540 | 0.0078477 |
| ENSG00000177243 | <i>DEFB103B</i>    | 12.86752713 | 4.068667323         | 0.94596  | 4.301099 | 0.0000169953 | 0.0083096 |
| ENSG00000176797 | <i>DEFB103A</i>    | 12.86752713 | 4.068667323         | 0.94596  | 4.301099 | 0.0000169953 | 0.0083096 |
| ENSG00000196805 | <i>SPRR2B</i>      | 12.46642556 | 4.007415528         | 0.94584  | 4.236884 | 0.0000226643 | 0.0105675 |
| ENSG00000255823 | <i>MTRNR2L8</i>    | 99.96331934 | -2.063829514        | 0.487551 | -4.23305 | 0.0000230542 | 0.0105675 |
| ENSG00000185966 | <i>LCE3E</i>       | 18.55284064 | 4.403689631         | 1.044843 | 4.214692 | 0.0000250120 | 0.0111174 |
| ENSG00000269741 | <i>KLK9</i>        | 38.39528424 | 3.634649191         | 0.869249 | 4.181368 | 0.0000289761 | 0.0125006 |
| ENSG00000163202 | <i>LCE3D</i>       | 21.85709696 | 3.766259743         | 0.907597 | 4.149703 | 0.0000332906 | 0.0136037 |
| ENSG00000172382 | <i>PRSS27</i>      | 235.5149533 | 2.146835495         | 0.51743  | 4.149036 | 0.0000333878 | 0.0136037 |
| ENSG00000265590 | <i>AP000275.65</i> | 13.45435781 | -2.313482025        | 0.565829 | -4.08866 | 0.0000433880 | 0.0172004 |
| ENSG00000163221 | <i>S100A12</i>     | 117.0760162 | 2.42404596          | 0.595909 | 4.067813 | 0.0000474564 | 0.0183182 |
| ENSG00000115602 | <i>ILIRL1</i>      | 44.99164745 | 2.186332063         | 0.544735 | 4.01357  | 0.0000598072 | 0.0224936 |
| ENSG00000185873 | <i>TMPRSS11B</i>   | 162.1426424 | 2.930935532         | 0.738498 | 3.968781 | 0.0000722414 | 0.0264909 |
| ENSG00000183307 | <i>CECR6</i>       | 16.55877878 | 1.882385854         | 0.478856 | 3.93101  | 0.0000845897 | 0.0302625 |
| ENSG00000178172 | <i>SPINK6</i>      | 11.19634078 | 3.736066016         | 0.960846 | 3.88831  | 0.0001009446 | 0.0352537 |

|                 |                     |             |              |          |          |              |           |
|-----------------|---------------------|-------------|--------------|----------|----------|--------------|-----------|
| ENSG00000169509 | <i>CRCT1</i>        | 124.6713786 | 3.255307448  | 0.839868 | 3.875975 | 0.0001061984 | 0.0353209 |
| ENSG00000087128 | <i>TMPRSS11E</i>    | 856.279728  | 2.335954629  | 0.603236 | 3.872373 | 0.0001077807 | 0.0353209 |
| ENSG00000235568 | <i>NFAM1</i>        | 385.2546016 | 2.109095274  | 0.544836 | 3.871064 | 0.0001083611 | 0.0353209 |
| ENSG00000143631 | <i>FLG</i>          | 60.85365689 | 2.707724203  | 0.703833 | 3.847112 | 0.0001195184 | 0.0381108 |
| ENSG00000059728 | <i>MXD1</i>         | 3049.682399 | 1.568764572  | 0.411317 | 3.814    | 0.0001367357 | 0.0407370 |
| ENSG00000204421 | <i>LY6G6C</i>       | 11.23753312 | 2.015579995  | 0.530386 | 3.800212 | 0.0001445722 | 0.0407370 |
| ENSG00000137558 | <i>PII5</i>         | 7.292990874 | 2.650754443  | 0.696318 | 3.806818 | 0.0001407663 | 0.0407370 |
| ENSG00000188373 | <i>C10orf99</i>     | 11.24888949 | 3.740112396  | 0.980735 | 3.813582 | 0.0001369669 | 0.0407370 |
| ENSG00000125910 | <i>SIPRA</i>        | 174.6183595 | 2.16060284   | 0.569216 | 3.795754 | 0.0001471953 | 0.0407370 |
| ENSG00000186474 | <i>KLK12</i>        | 66.90156166 | 2.810027115  | 0.739856 | 3.798075 | 0.0001458243 | 0.0407370 |
| ENSG00000101210 | <i>EEF1A2</i>       | 8.860473621 | 1.927591183  | 0.50611  | 3.808641 | 0.0001397326 | 0.0407370 |
| ENSG00000261272 | <i>MUC22</i>        | 53.13744678 | 2.376412656  | 0.628685 | 3.779973 | 0.0001568455 | 0.0418293 |
| ENSG00000154262 | <i>ABCA6</i>        | 91.04472433 | 0.918131079  | 0.242831 | 3.780947 | 0.0001562332 | 0.0418293 |
| ENSG00000162384 | <i>C1orf123</i>     | 400.5115764 | -0.274660048 | 0.072946 | -3.76525 | 0.0001663849 | 0.0435810 |
| ENSG00000180871 | <i>CXCR2</i>        | 559.0871712 | 2.296300313  | 0.613115 | 3.745302 | 0.0001801766 | 0.0447868 |
| ENSG00000196549 | <i>MME</i>          | 223.9783358 | 2.350426949  | 0.628268 | 3.741112 | 0.0001832022 | 0.0447868 |
| ENSG00000136943 | <i>CTSV</i>         | 169.9791044 | 1.651903131  | 0.441093 | 3.745024 | 0.0001803766 | 0.0447868 |
| ENSG00000204020 | <i>LIPN</i>         | 40.67847121 | 2.99211748   | 0.797534 | 3.751711 | 0.0001756320 | 0.0447868 |
| ENSG00000135636 | <i>DYSF</i>         | 374.8411619 | 2.317309474  | 0.621536 | 3.728362 | 0.0001927284 | 0.0462954 |
| ENSG00000113749 | <i>HRH2</i>         | 69.49149917 | 2.193258848  | 0.588972 | 3.723878 | 0.0001961854 | 0.0462954 |
| ENSG00000204021 | <i>LIPK</i>         | 6.857510391 | 2.959242988  | 0.798168 | 3.707544 | 0.0002092793 | 0.0462954 |
| ENSG00000068976 | <i>PYGM</i>         | 17.33765035 | 2.050543859  | 0.552144 | 3.713782 | 0.0002041850 | 0.0462954 |
| ENSG00000211448 | <i>DIO2</i>         | 155.321791  | 1.510686245  | 0.406436 | 3.716914 | 0.0002016710 | 0.0462954 |
| ENSG00000128917 | <i>DLL4</i>         | 11.45535912 | 2.447852976  | 0.660082 | 3.708409 | 0.0002085653 | 0.0462954 |
| ENSG00000188897 | <i>CTD-3088G3.8</i> | 323.1906061 | 1.78061636   | 0.480706 | 3.70417  | 0.0002120839 | 0.0462954 |
| ENSG00000125810 | <i>CD93</i>         | 601.1405142 | 1.759188231  | 0.475308 | 3.701152 | 0.0002146229 | 0.0462954 |
| ENSG00000178150 | <i>ZNF114</i>       | 7.989085047 | 2.029484872  | 0.549584 | 3.692762 | 0.0002218314 | 0.0471569 |
| ENSG00000149564 | <i>ESAM</i>         | 18.14827649 | 1.523369052  | 0.41299  | 3.688637 | 0.0002254587 | 0.0472433 |
| ENSG00000203710 | <i>CRI</i>          | 411.1933018 | 2.299624216  | 0.627107 | 3.667037 | 0.0002453771 | 0.0481389 |
| ENSG00000163464 | <i>CXCR1</i>        | 453.8760438 | 2.616490966  | 0.712521 | 3.672159 | 0.0002405100 | 0.0481389 |
| ENSG00000120129 | <i>DUSP1</i>        | 6115.128063 | 1.732263316  | 0.473872 | 3.655551 | 0.0002566297 | 0.0481389 |
| ENSG00000152137 | <i>HSPB8</i>        | 900.9324017 | 1.778499688  | 0.487281 | 3.649845 | 0.0002623991 | 0.0481389 |
| ENSG00000184508 | <i>HDDC3</i>        | 101.6802136 | -0.391065227 | 0.106941 | -3.65684 | 0.0002553462 | 0.0481389 |
| ENSG00000206172 | <i>HBA1</i>         | 9.437796303 | 3.255644841  | 0.885269 | 3.677576 | 0.0002354608 | 0.0481389 |
| ENSG00000141096 | <i>DPEP3</i>        | 8.922090167 | 2.600257498  | 0.709629 | 3.66425  | 0.0002480641 | 0.0481389 |
| ENSG00000076662 | <i>ICAM3</i>        | 139.9038075 | 2.270536264  | 0.620081 | 3.661675 | 0.0002505716 | 0.0481389 |
| ENSG00000244482 | <i>LILRA6</i>       | 189.3604241 | 2.418416833  | 0.662635 | 3.649695 | 0.0002625518 | 0.0481389 |
| ENSG00000170373 | <i>CST1</i>         | 131.6759055 | -3.542321735 | 0.97027  | -3.65086 | 0.0002613632 | 0.0481389 |
| ENSG00000171476 | <i>HOPX</i>         | 495.7867843 | 1.529493784  | 0.420797 | 3.634752 | 0.0002782483 | 0.0503870 |
| ENSG00000254415 | <i>SIGLEC14</i>     | 45.14160974 | 1.877309137  | 0.517712 | 3.626168 | 0.0002876585 | 0.0514558 |
| ENSG00000081237 | <i>PTPRC</i>        | 4546.785921 | 1.738982361  | 0.480872 | 3.616312 | 0.0002988305 | 0.0519840 |
| ENSG00000107736 | <i>CDH23</i>        | 109.6230575 | 0.860731249  | 0.238059 | 3.615619 | 0.0002996305 | 0.0519840 |
| ENSG00000142347 | <i>MYO1F</i>        | 1440.496128 | 1.976436605  | 0.546849 | 3.614228 | 0.0003012436 | 0.0519840 |
| ENSG00000188404 | <i>SELL</i>         | 592.631915  | 1.4423354    | 0.40133  | 3.593889 | 0.0003257790 | 0.0523150 |



|                 |                   |             |              |          |          |              |           |
|-----------------|-------------------|-------------|--------------|----------|----------|--------------|-----------|
| ENSG00000163219 | <i>ARHGAP25</i>   | 554.8197482 | 1.597820813  | 0.44492  | 3.591254 | 0.0003290910 | 0.0523150 |
| ENSG00000132965 | <i>ALOX5AP</i>    | 361.1835711 | 1.581896625  | 0.440738 | 3.5892   | 0.0003316943 | 0.0523150 |
| ENSG00000132359 | <i>RAP1GAP2</i>   | 213.009783  | 1.296496824  | 0.360265 | 3.598735 | 0.0003197694 | 0.0523150 |
| ENSG00000185862 | <i>EVI2B</i>      | 461.495179  | 1.699127547  | 0.472435 | 3.596531 | 0.0003224895 | 0.0523150 |
| ENSG00000276070 | <i>CCL4L2</i>     | 68.6673633  | 1.767519198  | 0.491474 | 3.596362 | 0.0003226984 | 0.0523150 |
| ENSG00000239998 | <i>LILRA2</i>     | 156.1708969 | 2.41359626   | 0.67145  | 3.594603 | 0.0003248862 | 0.0523150 |
| ENSG00000156282 | <i>CLDN17</i>     | 49.71152413 | 3.337239908  | 0.926759 | 3.600977 | 0.0003170233 | 0.0523150 |
| ENSG00000163563 | <i>MNDA</i>       | 868.6380366 | 2.092578113  | 0.58443  | 3.580547 | 0.0003428759 | 0.0523886 |
| ENSG00000100908 | <i>EMC9</i>       | 129.5613142 | -0.518890144 | 0.14484  | -3.5825  | 0.0003403253 | 0.0523886 |
| ENSG00000124126 | <i>PREX1</i>      | 1676.142545 | 1.370895286  | 0.382525 | 3.583807 | 0.0003386230 | 0.0523886 |
| ENSG00000116741 | <i>RGS2</i>       | 2515.481448 | 2.068800406  | 0.579639 | 3.569118 | 0.0003581852 | 0.0525386 |
| ENSG00000159884 | <i>CCDC107</i>    | 36.05187668 | -0.506034534 | 0.141596 | -3.57379 | 0.0003518523 | 0.0525386 |
| ENSG00000077420 | <i>APBB1IP</i>    | 243.778356  | 1.64456222   | 0.460633 | 3.570225 | 0.0003566752 | 0.0525386 |
| ENSG00000185201 | <i>IFITM2</i>     | 1123.511188 | 1.573639347  | 0.440251 | 3.574411 | 0.0003510174 | 0.0525386 |
| ENSG00000198576 | <i>ARC</i>        | 12.59565389 | 1.921251953  | 0.54003  | 3.557676 | 0.0003741507 | 0.0543370 |
| ENSG00000012779 | <i>ALOX5</i>      | 542.1569197 | 1.341197064  | 0.3777   | 3.55096  | 0.0003838295 | 0.0551962 |
| ENSG00000147408 | <i>CSGALNACT1</i> | 47.32334612 | 1.736073692  | 0.489823 | 3.544287 | 0.0003936766 | 0.0552874 |
| ENSG00000127084 | <i>FGD3</i>       | 488.0688261 | 1.329285081  | 0.375463 | 3.540387 | 0.0003995406 | 0.0552874 |
| ENSG00000160593 | <i>AMICA1</i>     | 1529.369162 | 1.427087059  | 0.402968 | 3.541442 | 0.0003979461 | 0.0552874 |
| ENSG00000184922 | <i>FMNLI</i>      | 417.2457271 | 1.543935634  | 0.435267 | 3.547097 | 0.0003895014 | 0.0552874 |
| ENSG00000203786 | <i>KPRP</i>       | 5.488623737 | 3.534762474  | 1.000553 | 3.532808 | 0.0004111703 | 0.0563649 |
| ENSG00000115008 | <i>ILIA</i>       | 41.13563665 | 2.044716665  | 0.579827 | 3.526423 | 0.0004212131 | 0.0572070 |
| ENSG00000085514 | <i>PILRA</i>      | 213.260431  | 1.839828677  | 0.522145 | 3.523597 | 0.0004257310 | 0.0572901 |
| ENSG00000015285 | <i>WAS</i>        | 196.6610082 | 1.566856851  | 0.445876 | 3.514111 | 0.0004412283 | 0.0588358 |
| ENSG00000204305 | <i>AGER</i>       | 31.35634892 | 1.115269179  | 0.317594 | 3.511616 | 0.0004453905 | 0.0588557 |
| ENSG00000081041 | <i>CXCL2</i>      | 121.8368299 | 1.121447805  | 0.320025 | 3.504247 | 0.0004578998 | 0.0599685 |
| ENSG00000117115 | <i>PADI2</i>      | 311.0156325 | 1.595711216  | 0.455678 | 3.501843 | 0.0004620517 | 0.0599768 |
| ENSG00000186806 | <i>VSIG10L</i>    | 112.6784624 | 1.836473622  | 0.524908 | 3.498656 | 0.0004676100 | 0.0601658 |
| ENSG00000123329 | <i>ARHGAP9</i>    | 479.2259745 | 1.504954786  | 0.430779 | 3.493566 | 0.0004766144 | 0.0607911 |
| ENSG00000197405 | <i>C5AR1</i>      | 1048.994493 | 2.117769646  | 0.606742 | 3.490394 | 0.0004823089 | 0.0609871 |
| ENSG00000111181 | <i>SLC6A12</i>    | 40.50839526 | 1.247431148  | 0.357807 | 3.486322 | 0.0004897108 | 0.0612578 |
| ENSG00000169715 | <i>MT1E</i>       | 513.315856  | -0.685757788 | 0.196795 | -3.48464 | 0.0004928019 | 0.0612578 |
| ENSG00000132510 | <i>KDM6B</i>      | 579.8129011 | 1.305400127  | 0.375133 | 3.479832 | 0.0005017278 | 0.0618432 |
| ENSG00000189051 | <i>RNF222</i>     | 48.81576384 | 2.238886942  | 0.643902 | 3.477063 | 0.0005069389 | 0.0619648 |
| ENSG00000130775 | <i>THEMIS2</i>    | 767.653598  | 1.653998209  | 0.477286 | 3.465427 | 0.0005293899 | 0.0625580 |
| ENSG00000016602 | <i>CLCA4</i>      | 2436.442163 | 1.817346604  | 0.523652 | 3.470523 | 0.0005194464 | 0.0625580 |
| ENSG00000151702 | <i>FLII</i>       | 244.7806654 | 1.307265921  | 0.377325 | 3.464563 | 0.0005310932 | 0.0625580 |
| ENSG00000126860 | <i>EVI2A</i>      | 228.3966342 | 1.699506437  | 0.489786 | 3.469899 | 0.0005206545 | 0.0625580 |
| ENSG00000127507 | <i>ADGRE2</i>     | 416.7557519 | 1.753547713  | 0.506288 | 3.463541 | 0.0005331160 | 0.0625580 |
| ENSG00000059804 | <i>SLC2A3</i>     | 905.4839017 | 2.010343885  | 0.581013 | 3.460064 | 0.0005400461 | 0.0628682 |
| ENSG00000114268 | <i>PFKFB4</i>     | 165.0457522 | 1.460312211  | 0.422942 | 3.452745 | 0.0005549131 | 0.0635896 |
| ENSG00000155926 | <i>SLA</i>        | 742.9187908 | 1.459286381  | 0.422635 | 3.452832 | 0.0005547350 | 0.0635896 |
| ENSG00000159337 | <i>PLA2G4D</i>    | 13.88198456 | 1.569829037  | 0.455069 | 3.44965  | 0.0005613144 | 0.0638245 |
| ENSG00000171608 | <i>PIK3CD</i>     | 776.2463976 | 1.270669369  | 0.368994 | 3.443601 | 0.0005740223 | 0.0647674 |

|                 |                 |             |              |          |          |              |           |
|-----------------|-----------------|-------------|--------------|----------|----------|--------------|-----------|
| ENSG00000132334 | <i>PTPRE</i>    | 1056.794435 | 1.364429099  | 0.396935 | 3.437411 | 0.0005873037 | 0.0657601 |
| ENSG00000148841 | <i>ITPRIP</i>   | 553.3588369 | 1.316881276  | 0.383757 | 3.431554 | 0.0006001332 | 0.0659737 |
| ENSG00000129353 | <i>SLC44A2</i>  | 3678.47438  | 0.488097138  | 0.142286 | 3.430394 | 0.0006027045 | 0.0659737 |
| ENSG00000101187 | <i>SLCO4A1</i>  | 160.6016704 | 1.311705529  | 0.382227 | 3.431743 | 0.0005997159 | 0.0659737 |
| ENSG00000124216 | <i>SNAI1</i>    | 7.696103487 | 1.970326867  | 0.574818 | 3.427739 | 0.0006086298 | 0.0661288 |
| ENSG00000152518 | <i>ZFP36L2</i>  | 658.0270618 | 0.533612565  | 0.155805 | 3.424877 | 0.0006150775 | 0.0663379 |
| ENSG00000140678 | <i>ITGAX</i>    | 1565.747602 | 1.594065917  | 0.465752 | 3.42256  | 0.0006203438 | 0.0664175 |
| ENSG00000082074 | <i>FYB</i>      | 991.9259765 | 1.340812758  | 0.392852 | 3.413019 | 0.0006424741 | 0.0665579 |
| ENSG00000197081 | <i>IGF2R</i>    | 4115.112231 | 0.870500071  | 0.254689 | 3.41789  | 0.0006310867 | 0.0665579 |
| ENSG00000106780 | <i>MEGF9</i>    | 783.34156   | 1.002450648  | 0.293299 | 3.417844 | 0.0006311927 | 0.0665579 |
| ENSG00000178372 | <i>CALML5</i>   | 227.8365785 | 1.723079938  | 0.505537 | 3.408413 | 0.0006534185 | 0.0665579 |
| ENSG00000033327 | <i>GAB2</i>     | 587.0589028 | 1.009740964  | 0.2958   | 3.413589 | 0.0006411326 | 0.0665579 |
| ENSG00000091592 | <i>NLRP1</i>    | 904.1310348 | 0.92872128   | 0.272274 | 3.410982 | 0.0006472944 | 0.0665579 |
| ENSG00000092929 | <i>UNC13D</i>   | 348.5835282 | 1.30726178   | 0.383488 | 3.40887  | 0.0006523250 | 0.0665579 |
| ENSG00000183091 | <i>NEB</i>      | 147.948048  | 1.165209102  | 0.342494 | 3.402126 | 0.0006686381 | 0.0676385 |
| ENSG00000095370 | <i>SH2D3C</i>   | 124.8445678 | 1.396717987  | 0.410791 | 3.40007  | 0.0006736854 | 0.0676823 |
| ENSG00000105329 | <i>TGFB1</i>    | 135.7183389 | 1.026453687  | 0.30292  | 3.388533 | 0.0007026760 | 0.0701146 |
| ENSG00000151726 | <i>ACSL1</i>    | 3497.092379 | 1.115803771  | 0.329795 | 3.383326 | 0.0007161359 | 0.0709749 |
| ENSG00000213190 | <i>MLLT11</i>   | 34.96655406 | 0.991937175  | 0.293853 | 3.375624 | 0.0007364847 | 0.0720184 |
| ENSG00000128016 | <i>ZFP36</i>    | 2290.304626 | 1.418453692  | 0.420154 | 3.376035 | 0.0007353859 | 0.0720184 |
| ENSG00000183625 | <i>CCR3</i>     | 42.86315786 | 2.443863244  | 0.726592 | 3.363461 | 0.0007697164 | 0.0728125 |
| ENSG00000120738 | <i>EGR1</i>     | 617.768747  | 2.058619948  | 0.613673 | 3.354587 | 0.0007948363 | 0.0728125 |
| ENSG00000057657 | <i>PRDMI</i>    | 535.5767203 | 1.000608405  | 0.298692 | 3.349963 | 0.0008082233 | 0.0728125 |
| ENSG00000181016 | <i>LSMEM1</i>   | 44.37615442 | 1.542909674  | 0.460244 | 3.35237  | 0.0008012297 | 0.0728125 |
| ENSG00000120156 | <i>TEK</i>      | 12.27850013 | 2.088865477  | 0.62069  | 3.365391 | 0.0007643512 | 0.0728125 |
| ENSG00000107796 | <i>ACTA2</i>    | 21.98390633 | -1.229083585 | 0.36527  | -3.36486 | 0.0007658134 | 0.0728125 |
| ENSG00000066336 | <i>SPI1</i>     | 474.2143771 | 1.539695642  | 0.4568   | 3.370612 | 0.0007500137 | 0.0728125 |
| ENSG00000168010 | <i>ATG16L2</i>  | 754.9539635 | 1.226851569  | 0.366626 | 3.346334 | 0.0008188782 | 0.0728125 |
| ENSG00000161638 | <i>ITGA5</i>    | 427.2568365 | 1.294966403  | 0.385826 | 3.356348 | 0.0007897905 | 0.0728125 |
| ENSG00000166501 | <i>PRKCB</i>    | 420.2501617 | 1.554013311  | 0.462873 | 3.357318 | 0.0007870255 | 0.0728125 |
| ENSG00000167916 | <i>KRT24</i>    | 2397.09258  | 2.331361408  | 0.692022 | 3.368913 | 0.0007546513 | 0.0728125 |
| ENSG00000172081 | <i>MOB3A</i>    | 500.967832  | 1.077518538  | 0.322239 | 3.343849 | 0.0008262464 | 0.0728125 |
| ENSG00000099308 | <i>MAST3</i>    | 289.4385807 | 1.096338807  | 0.327958 | 3.342928 | 0.0008289942 | 0.0728125 |
| ENSG00000175489 | <i>LRRC25</i>   | 220.170772  | 1.705010136  | 0.508146 | 3.355353 | 0.0007926364 | 0.0728125 |
| ENSG00000171777 | <i>RASGRP4</i>  | 169.2813114 | 2.401692932  | 0.718349 | 3.343353 | 0.0008277259 | 0.0728125 |
| ENSG00000105501 | <i>SIGLEC5</i>  | 68.90107457 | 2.374748837  | 0.709128 | 3.348828 | 0.0008115406 | 0.0728125 |
| ENSG00000177663 | <i>IL17RA</i>   | 892.8199897 | 0.919762481  | 0.273986 | 3.356964 | 0.0007880339 | 0.0728125 |
| ENSG00000166535 | <i>A2ML1</i>    | 1002.086654 | 1.450167898  | 0.434398 | 3.33834  | 0.0008428066 | 0.0730048 |
| ENSG00000110876 | <i>SELPLG</i>   | 498.0963179 | 1.383877919  | 0.414676 | 3.337251 | 0.0008461152 | 0.0730048 |
| ENSG00000128383 | <i>APOBEC3A</i> | 456.5435759 | 1.968695343  | 0.589511 | 3.339542 | 0.0008391660 | 0.0730048 |
| ENSG00000091106 | <i>NLRC4</i>    | 63.59447992 | 1.595926681  | 0.479431 | 3.32879  | 0.0008722405 | 0.0732848 |
| ENSG00000115165 | <i>CYIP</i>     | 605.0026885 | 1.549162056  | 0.465529 | 3.327745 | 0.0008755193 | 0.0732848 |
| ENSG00000173559 | <i>NABP1</i>    | 3508.644402 | 1.454169197  | 0.437143 | 3.326532 | 0.0008793378 | 0.0732848 |
| ENSG00000175315 | <i>CST6</i>     | 43.40935031 | 1.437118927  | 0.431248 | 3.332468 | 0.0008607948 | 0.0732848 |

|                 |                 |             |              |          |          |              |           |
|-----------------|-----------------|-------------|--------------|----------|----------|--------------|-----------|
| ENSG00000133246 | <i>PRAMI</i>    | 42.79085834 | 1.154190513  | 0.346598 | 3.330052 | 0.0008682973 | 0.0732848 |
| ENSG00000198053 | <i>SIRPA</i>    | 520.3180461 | 1.149634662  | 0.345046 | 3.331828 | 0.0008627758 | 0.0732848 |
| ENSG00000163209 | <i>SPRR3</i>    | 9398.66207  | 1.892942748  | 0.569654 | 3.32297  | 0.0008906446 | 0.0733931 |
| ENSG00000188305 | <i>C19orf35</i> | 14.74118642 | 2.027840744  | 0.610195 | 3.323266 | 0.0008897002 | 0.0733931 |
| ENSG00000115590 | <i>ILIR2</i>    | 359.8218257 | 2.191449718  | 0.661145 | 3.31463  | 0.0009176438 | 0.0747778 |
| ENSG00000124882 | <i>EREG</i>     | 227.0051715 | 1.760952973  | 0.531171 | 3.315229 | 0.0009156795 | 0.0747778 |
| ENSG00000113070 | <i>HBEGF</i>    | 280.9775264 | 1.604054578  | 0.484422 | 3.311273 | 0.0009287250 | 0.0752626 |
| ENSG00000178726 | <i>THBD</i>     | 569.6998692 | 2.072148166  | 0.626151 | 3.30934  | 0.0009351605 | 0.0753678 |
| ENSG00000197943 | <i>PLCG2</i>    | 550.1524259 | 0.988242075  | 0.299196 | 3.302994 | 0.0009565855 | 0.0766732 |
| ENSG00000162572 | <i>SCNN1D</i>   | 52.00949878 | 0.779800895  | 0.236387 | 3.298826 | 0.0009709006 | 0.0768620 |
| ENSG00000158887 | <i>MPZ</i>      | 43.30825426 | 1.239879961  | 0.376097 | 3.296706 | 0.0009782593 | 0.0768620 |
| ENSG00000214113 | <i>LYRM4</i>    | 209.8049346 | -0.386119827 | 0.117153 | -3.29586 | 0.0009811975 | 0.0768620 |
| ENSG00000151948 | <i>GLT1D1</i>   | 194.0027529 | 2.453177853  | 0.744772 | 3.293865 | 0.0009882004 | 0.0768620 |
| ENSG00000141527 | <i>CARD14</i>   | 189.6181425 | 0.664607081  | 0.201809 | 3.293245 | 0.0009903816 | 0.0768620 |
| ENSG00000198342 | <i>ZNF442</i>   | 55.29332415 | -0.633468395 | 0.191935 | -3.30043 | 0.0009653628 | 0.0768620 |
| ENSG00000163218 | <i>PGLYRP4</i>  | 35.40514359 | 1.507393971  | 0.45914  | 3.283079 | 0.0010267976 | 0.0792688 |
| ENSG00000130475 | <i>FCHO1</i>    | 85.17477418 | 1.396035122  | 0.426313 | 3.274673 | 0.0010578446 | 0.0812380 |
| ENSG00000167759 | <i>KLK13</i>    | 432.5007784 | 2.177708944  | 0.667258 | 3.263671 | 0.0010997881 | 0.0840192 |
| ENSG00000143546 | <i>SI00A8</i>   | 10686.37567 | 2.151083123  | 0.659681 | 3.260795 | 0.0011110021 | 0.0843267 |
| ENSG00000213347 | <i>MXD3</i>     | 159.4639724 | 1.254876515  | 0.385071 | 3.25882  | 0.0011187671 | 0.0843267 |
| ENSG00000101336 | <i>HCK</i>      | 871.1965188 | 1.616043212  | 0.495987 | 3.258239 | 0.0011210598 | 0.0843267 |
| ENSG00000204542 | <i>C6orf15</i>  | 6.203863346 | 3.043601347  | 0.935576 | 3.253185 | 0.0011411927 | 0.0853732 |
| ENSG00000110203 | <i>FOLR3</i>    | 10.09684646 | 2.947475316  | 0.906403 | 3.251838 | 0.0011466131 | 0.0853732 |
| ENSG00000062282 | <i>DGAT2</i>    | 385.1136643 | 1.889009237  | 0.582431 | 3.243316 | 0.0011814721 | 0.0875244 |
| ENSG00000133710 | <i>SPINK5</i>   | 1396.236797 | 1.523517868  | 0.47005  | 3.241184 | 0.0011903453 | 0.0877386 |
| ENSG00000119535 | <i>CSF3R</i>    | 3574.954552 | 2.277942108  | 0.706229 | 3.225502 | 0.0012575197 | 0.0899771 |
| ENSG00000159516 | <i>SPRR2G</i>   | 8.900936315 | 2.970580876  | 0.920519 | 3.22707  | 0.0012506472 | 0.0899771 |
| ENSG00000154429 | <i>CCSAP</i>    | 160.9765066 | 0.524627084  | 0.162647 | 3.225554 | 0.0012572927 | 0.0899771 |
| ENSG00000188549 | <i>C15orf52</i> | 151.2467778 | 0.785723445  | 0.243249 | 3.23012  | 0.0012373831 | 0.0899771 |
| ENSG00000160255 | <i>ITGB2</i>    | 1285.404679 | 1.207525803  | 0.373976 | 3.22889  | 0.0012427170 | 0.0899771 |
| ENSG00000173638 | <i>SLC19A1</i>  | 147.9920447 | 1.589686916  | 0.492758 | 3.2261   | 0.0012548962 | 0.0899771 |
| ENSG00000155307 | <i>SAMSN1</i>   | 447.0759092 | 1.459101124  | 0.453116 | 3.220151 | 0.0012812317 | 0.0912287 |
| ENSG00000162747 | <i>FCGR3B</i>   | 1127.66368  | 2.265580387  | 0.706557 | 3.206507 | 0.0013435703 | 0.0915786 |
| ENSG00000168918 | <i>INPP5D</i>   | 539.7586028 | 0.759423223  | 0.236774 | 3.207374 | 0.0013395295 | 0.0915786 |
| ENSG00000188001 | <i>TPRG1</i>    | 146.6351541 | 0.982323984  | 0.305399 | 3.216525 | 0.0012975312 | 0.0915786 |
| ENSG00000120318 | <i>ARAP3</i>    | 312.6943691 | 0.880062277  | 0.274794 | 3.202629 | 0.0013617921 | 0.0915786 |
| ENSG00000152926 | <i>ZNF117</i>   | 700.4702591 | 0.667203224  | 0.208406 | 3.201464 | 0.0013673106 | 0.0915786 |
| ENSG00000059377 | <i>TBXAS1</i>   | 356.7962638 | 1.33421913   | 0.415333 | 3.212407 | 0.0013162757 | 0.0915786 |
| ENSG00000187479 | <i>C11orf96</i> | 14.69699214 | 1.958308711  | 0.611243 | 3.203816 | 0.0013561901 | 0.0915786 |
| ENSG00000171310 | <i>CHST11</i>   | 408.7728418 | 1.186643045  | 0.370603 | 3.201929 | 0.0013651076 | 0.0915786 |
| ENSG00000131471 | <i>AOC3</i>     | 22.77300856 | 1.226591369  | 0.381778 | 3.212835 | 0.0013143161 | 0.0915786 |
| ENSG00000173868 | <i>PHOSPHO1</i> | 209.3184166 | 2.627190768  | 0.818348 | 3.21036  | 0.0013256865 | 0.0915786 |
| ENSG00000160229 | <i>ZNF66</i>    | 56.13988521 | 0.87651468   | 0.273497 | 3.204843 | 0.0013513616 | 0.0915786 |
| ENSG00000188505 | <i>NCCRPI</i>   | 649.3820155 | 1.424720362  | 0.443692 | 3.211057 | 0.0013224755 | 0.0915786 |

|                 |                |             |              |          |          |              |           |
|-----------------|----------------|-------------|--------------|----------|----------|--------------|-----------|
| ENSG00000100985 | <i>MMP9</i>    | 105.0085456 | 1.801939784  | 0.560903 | 3.212569 | 0.0013155353 | 0.0915786 |
| ENSG00000189056 | <i>RELN</i>    | 20.41484416 | 1.821826465  | 0.570354 | 3.194201 | 0.0014021827 | 0.0934873 |
| ENSG00000130592 | <i>LSP1</i>    | 1872.970387 | 0.886506466  | 0.277959 | 3.189347 | 0.0014259475 | 0.0946416 |
| ENSG00000106541 | <i>AGR2</i>    | 41664.02551 | -0.714062434 | 0.224157 | -3.18555 | 0.0014447875 | 0.0954601 |
| ENSG00000104894 | <i>CD37</i>    | 157.4882807 | 1.249881462  | 0.393085 | 3.179671 | 0.0014744245 | 0.0969814 |
| ENSG00000146112 | <i>PPP1R18</i> | 570.9228967 | 1.216818205  | 0.382862 | 3.178213 | 0.0014818607 | 0.0970354 |
| ENSG00000112137 | <i>PHACTR1</i> | 270.347717  | 1.480915393  | 0.466756 | 3.17278  | 0.0015098686 | 0.0970487 |
| ENSG00000112195 | <i>TREML2</i>  | 177.9198685 | 2.368986837  | 0.747134 | 3.170764 | 0.0015203883 | 0.0970487 |
| ENSG00000170423 | <i>KRT78</i>   | 380.5887664 | 1.924890584  | 0.607367 | 3.169241 | 0.0015283781 | 0.0970487 |
| ENSG00000188215 | <i>DCUN1D3</i> | 490.9316317 | 0.865486098  | 0.27282  | 3.172375 | 0.0015119764 | 0.0970487 |
| ENSG00000101236 | <i>RNF24</i>   | 802.5230879 | 0.95210711   | 0.300246 | 3.171085 | 0.0015187079 | 0.0970487 |
| ENSG00000087589 | <i>CASS4</i>   | 294.9893157 | 1.73106507   | 0.544957 | 3.176515 | 0.0014905605 | 0.0970487 |
| ENSG00000147168 | <i>IL2RG</i>   | 270.2098958 | 0.933031134  | 0.294288 | 3.170466 | 0.0015219465 | 0.0970487 |
| ENSG00000125378 | <i>BMP4</i>    | 17.60094942 | -1.212353032 | 0.38289  | -3.16632 | 0.0015438084 | 0.0976060 |
| ENSG00000111052 | <i>LIN7A</i>   | 40.68503686 | 1.801629323  | 0.569401 | 3.164079 | 0.0015557467 | 0.0979386 |
| ENSG00000115935 | <i>WIPF1</i>   | 622.5961766 | 1.143319049  | 0.361607 | 3.161768 | 0.0015681439 | 0.0982972 |
| ENSG00000126233 | <i>SLURP1</i>  | 62.95038101 | 1.64617095   | 0.521552 | 3.156293 | 0.0015978817 | 0.0997350 |

Table S3: Biological processes enriched at baseline between “Cold” and “No Cold” groups

| ID         | Description                                       | GeneRatio | BgRatio     | Pvalue   | P.adjust | qvalue   | geneID                                                                                                                                                                                                              | Count |
|------------|---------------------------------------------------|-----------|-------------|----------|----------|----------|---------------------------------------------------------------------------------------------------------------------------------------------------------------------------------------------------------------------|-------|
| GO:0042119 | neutrophil activation                             | 0.157895  | 0.028536908 | 1.06E-15 | 2.36E-12 | 2.11E-12 | <i>PADI2/CDA/S100A12/S100A8/MNDA/FCGR3B/SELL/PTPRC/CRI/CXCR2/CXCR1/MME/IGF2R/CALML5/ALOX5/FOLR3/SLC2A3/ARHGAP9/OLFM4/ITGAX/UNC13D/PRAM1/SLC44A2/C5AR1/SIGLEC5/SIGLEC14/LILRA2/SIRPA/CD93/MMP9/PREX1/ITGB2/NFAM1</i> | 33    |
| GO:0002283 | neutrophil activation involved in immune response | 0.15311   | 0.027961567 | 4.04E-15 | 3.89E-12 | 3.48E-12 | <i>PADI2/CDA/S100A12/S100A8/MNDA/FCGR3B/SELL/PTPRC/CRI/CXCR2/CXCR1/MME/IGF2R/CALML5/ALOX5/FOLR3/SLC2A3/ARHGAP9/OLFM4/ITGAX/UNC13D/PRAM1/SLC44A2/C5AR1/SIGLEC5/SIGLEC14/LILRA2/SIRPA/CD93/MMP9/ITGB2/NFAM1</i>       | 32    |
| GO:0002446 | neutrophil mediated immunity                      | 0.148325  | 0.02870951  | 5.47E-14 | 3.16E-11 | 2.83E-11 | <i>PADI2/CDA/S100A12/S100A8/MNDA/FCGR3B/SELL/PTPRC/CRI/CXCR2/CXCR1/MME/IGF2R/CALML5/ALOX5/FOLR3/SLC2A3/ARHGAP9/OLFM4/ITGAX/UNC13D/PRAM1/SLC44A2/C5AR1/SIGLEC5/SIGLEC14/SIRPA/CD93/MMP9/ITGB2/NFAM1</i>              | 31    |
| GO:0043312 | neutrophil degranulation                          | 0.148325  | 0.027904033 | 2.54E-14 | 1.84E-11 | 1.64E-11 | <i>PADI2/CDA/S100A12/S100A8/MNDA/FCGR3B/SELL/PTPRC/CRI/CXCR2/CXCR1/MME/IGF2R/CALML5/ALOX5/FOLR3/SLC2A3/ARHGAP9/OLFM4/ITGAX/UNC13D/PRAM1/SLC44A2/C5AR1/SIGLEC5/SIGLEC14/SIRPA/CD93/MMP9/ITGB2/NFAM1</i>              | 31    |
| GO:0008544 | epidermis development                             | 0.138756  | 0.02617801  | 2.02E-13 | 9.74E-11 | 8.70E-11 | <i>FLG/LCE3E/LCE3D/SPRR3/SPRR2D/SPRR2B/SPRR2E/SPRR2F/SPRR2G/REG/SPINK5/SPINK6/CTSV/CALML5/LIPK/LIPN/CST6/KRT78/BMP4/KRT24/ZFP36/CNFN/CLK5/CLK7/CLK8/CLK12/CLK13/SNAI1/WAS</i>                                       | 29    |
| GO:0050900 | leukocyte migration                               | 0.133971  | 0.027098556 | 2.94E-12 | 1.06E-09 | 9.50E-10 | <i>PIK3CD/PADI2/CSF3R/ECM1/S100A12/S100A8/SELL/IL1A/CXCR2/CXCR1/INPP5D/CXCL2/TEK/JAML/ESAM/ITGA5/SELPLG/ITGAX/ADGRE2/TGFB1/C5AR1/SIRPA/THBD/HCK/MMP9/PREX1/ITGB2/IL17RA</i>                                         | 28    |
| GO:0043588 | skin development                                  | 0.119617  | 0.023646511 | 2.89E-11 | 7.61E-09 | 6.80E-09 | <i>FLG/LCE3E/LCE3D/SPRR3/SPRR2D/SPRR2B/SPRR2E/SPRR2F/SPRR2G/ASPRV1/REG/SPINK5/SPINK6/CTSV/LIPK/LIPN/KRT78/KRT24/ZFP36/CNFN/CLK5/CLK8/CLK12/CLK13/SNAI1</i>                                                          | 25    |
| GO:0009913 | epidermal cell differentiation                    | 0.114833  | 0.020079397 | 5.69E-12 | 1.65E-09 | 1.47E-09 | <i>FLG/LCE3E/LCE3D/SPRR3/SPRR2D/SPRR2B/SPRR2E/SPRR2F/SPRR2G/REG/SPINK5/SPINK6/CTSV/LIPK/LIPN/KRT78/BMP4/KRT24/ZFP36/CNFN/CLK5/CLK8/CLK12/CLK13</i>                                                                  | 24    |
| GO:0030216 | keratinocyte differentiation                      | 0.110048  | 0.017260227 | 1.74E-12 | 7.18E-10 | 6.42E-10 | <i>FLG/LCE3E/LCE3D/SPRR3/SPRR2D/SPRR2B/SPRR2E/SPRR2F/SPRR2G/REG/SPINK5/SPINK6/CTSV/LIPK/LIPN/KRT78/KRT24/ZFP36/CNFN/CLK5/CLK8/CLK12/CLK13</i>                                                                       | 23    |
| GO:0031424 | keratinization                                    | 0.095694  | 0.013002704 | 3.83E-12 | 1.23E-09 | 1.10E-09 | <i>FLG/LCE3E/LCE3D/SPRR3/SPRR2D/SPRR2B/SPRR2E/SPRR2F/SPRR2G/SPINK5/SPINK6/LIPK/LIPN/KRT78/KRT24/CNFN/CLK5/CLK8/CLK12/CLK13</i>                                                                                      | 20    |

|            |                                                                    |          |             |          |          |          |                                                                                                                      |    |
|------------|--------------------------------------------------------------------|----------|-------------|----------|----------|----------|----------------------------------------------------------------------------------------------------------------------|----|
| GO:0070268 | cornification                                                      | 0.086124 | 0.006501352 | 1.63E-15 | 2.36E-12 | 2.11E-12 | <i>FLG/LCE3D/SPRR3/SPRR2D/SPRR2B/SPRR2E/SPRR2F/SPRR2G/SPINK5/SPINK6/LIPK/LIPN/KRT78/KRT24/KLK5/KLK8/KLK12/KLK13</i>  | 18 |
| GO:0097530 | granulocyte migration                                              | 0.062201 | 0.007134227 | 3.21E-09 | 7.75E-07 | 6.92E-07 | <i>PIK3CD/CSF3R/S100A12/S100A8/IL1A/CXCR2/CXCL2/JAML/ADGRE2/C5AR1/PREX1/ITGB2/IL17RA</i>                             | 13 |
| GO:0002521 | leukocyte differentiation                                          | 0.090909 | 0.027558829 | 5.55E-06 | 7.65E-04 | 6.83E-04 | <i>PIK3CD/PTPRC/CR1/ZFP36L2/INPP5D/EGR1/SPINK5/AGER/PRDM1/SPI1/GAB2/BMP4/DLL4/PLCG2/EVI2B/TGFB1/MMP9/PREX1/NFAM1</i> | 19 |
| GO:0002768 | immune response-regulating cell surface receptor signaling pathway | 0.08134  | 0.026350613 | 4.07E-05 | 3.37E-03 | 3.01E-03 | <i>PIK3CD/THEMIS2/MNDA/PTPRC/CR1/WIPF1/INPP5D/FYB1/GAB2/PRKCB/PLCG2/ICAM3/C5AR1/LILRA2/HCK/NFAM1/WAS</i>             | 17 |
| GO:0002429 | immune response-activating cell surface receptor signaling pathway | 0.076555 | 0.024509522 | 6.00E-05 | 4.34E-03 | 3.88E-03 | <i>PIK3CD/THEMIS2/MNDA/PTPRC/CR1/WIPF1/INPP5D/FYB1/PRKCB/PLCG2/ICAM3/C5AR1/LILRA2/HCK/NFAM1/WAS</i>                  | 16 |
| GO:0042110 | T cell activation                                                  | 0.076555 | 0.02686842  | 1.74E-04 | 1.12E-02 | 9.99E-03 | <i>PIK3CD/PTPRC/CR1/ZFP36L2/EGR1/SPINK5/AGER/TREML2/PRDM1/APBB1P/JAML/BMP4/DLL4/TGFB1/PREX1/WAS</i>                  | 16 |
| GO:0060326 | cell chemotaxis                                                    | 0.07177  | 0.015534204 | 9.89E-07 | 1.51E-04 | 1.35E-04 | <i>PIK3CD/PADI2/CSF3R/S100A12/S100A8/CXCR2/CXCR1/CXCL2/HBEGF/JAML/ADGRE2/C5AR1/PREX1/ITGB2/IL17RA</i>                | 15 |
| GO:0030098 | lymphocyte differentiation                                         | 0.07177  | 0.018871181 | 1.07E-05 | 1.23E-03 | 1.10E-03 | <i>PIK3CD/PTPRC/CR1/ZFP36L2/INPP5D/EGR1/SPINK5/PRDM1/SPI1/BMP4/DLL4/PLCG2/TGFB1/PREX1/NFAM1</i>                      | 15 |
| GO:0031349 | positive regulation of defense response                            | 0.07177  | 0.025947874 | 3.80E-04 | 1.93E-02 | 1.72E-02 | <i>PGLYRP4/S100A12/S100A8/NLRC4/IL1RL1/EREG/PLCG2/ICAM3/TGFB1/KLK5/KLK7/LILRA2/HCK/ITGB2/IL17RA</i>                  | 15 |
| GO:0040017 | positive regulation of locomotion                                  | 0.07177  | 0.028191704 | 8.91E-04 | 3.30E-02 | 2.95E-02 | <i>PIK3CD/PTPRC/IL1A/CXCL2/HBEGF/AGER/RELN/TEK/ITGA5/BMP4/TGFB1/C5AR1/MMP9/PREX1/SNAI1</i>                           | 15 |
| GO:0030595 | leukocyte chemotaxis                                               | 0.066986 | 0.01167942  | 1.70E-07 | 3.07E-05 | 2.75E-05 | <i>PIK3CD/PADI2/CSF3R/S100A12/S100A8/CXCR2/CXCR1/CXCL2/JAML/ADGRE2/C5AR1/PREX1/ITGB2/IL17RA</i>                      | 14 |
| GO:1901342 | regulation of vasculature development                              | 0.066986 | 0.017662965 | 2.18E-05 | 2.10E-03 | 1.88E-03 | <i>ECM1/IL1A/CCR3/EGR1/SPINK5/NOS3/TEK/ITGA5/BMP4/DLL4/PRKCB/SERPINB7/C5AR1/ITGB2</i>                                | 14 |
| GO:0002697 | regulation of immune effector process                              | 0.066986 | 0.023128704 | 3.76E-04 | 1.93E-02 | 1.72E-02 | <i>PTPRC/CR1/SPINK5/AGER/GAB2/UNC13D/PRAM1/ADGRE2/TGFB1/C5AR1/KLK5/KLK7/ITGB2/WAS</i>                                | 14 |
| GO:0051346 | negative regulation of hydrolase activity                          | 0.066986 | 0.024394454 | 6.37E-04 | 2.63E-02 | 2.35E-02 | <i>ECM1/RGS2/CR1/NLRC4/SPINK5/SPINK6/SPINK7/NOS3/PII5/CST6/A2ML1/SERPINB7/CST1/MMP9</i>                              | 14 |

|            |                                                    |          |             |          |          |          |                                                                                                    |    |
|------------|----------------------------------------------------|----------|-------------|----------|----------|----------|----------------------------------------------------------------------------------------------------|----|
| GO:0052547 | regulation of peptidase activity                   | 0.066986 | 0.024509522 | 6.67E-04 | 2.72E-02 | 2.43E-02 | <i>ECM1/S100A8/CR1/NLRC4/SPINK5/SPINK6/SPINK7/PII5/CST6/A2ML1/NLRP1/SERPINB7/CST1/MMP9</i>         | 14 |
| GO:0030335 | positive regulation of cell migration              | 0.066986 | 0.025430067 | 9.52E-04 | 3.37E-02 | 3.02E-02 | <i>PIK3CD/PTPRC/IL1A/CXCL2/HBEGF/RELN/TEK/ITGA5/BMP4/TGFB1/C5AR1/MMP9/PREX1/SNAI1</i>              | 14 |
| GO:1903706 | regulation of hemopoiesis                          | 0.066986 | 0.025775272 | 1.08E-03 | 3.71E-02 | 3.32E-02 | <i>CSF3R/CR1/ZFP36L2/INPP5D/SPINK5/AGER/PRDM1/SPI1/BMP4/PRKCB/EVI2B/ZFP36/TGFB1/NFAM1</i>          | 14 |
| GO:2000147 | positive regulation of cell motility               | 0.066986 | 0.026465681 | 1.39E-03 | 4.30E-02 | 3.84E-02 | <i>PIK3CD/PTPRC/IL1A/CXCL2/HBEGF/RELN/TEK/ITGA5/BMP4/TGFB1/C5AR1/MMP9/PREX1/SNAI1</i>              | 14 |
| GO:0051272 | positive regulation of cellular component movement | 0.066986 | 0.027213624 | 1.80E-03 | 4.97E-02 | 4.44E-02 | <i>PIK3CD/PTPRC/IL1A/CXCL2/HBEGF/RELN/TEK/ITGA5/BMP4/TGFB1/C5AR1/MMP9/PREX1/SNAI1</i>              | 14 |
| GO:0097529 | myeloid leukocyte migration                        | 0.062201 | 0.010298602 | 2.61E-07 | 4.45E-05 | 3.98E-05 | <i>PIK3CD/CSF3R/S100A12/S100A8/IL1A/CXCR2/CXCL2/JAML/ADGRE2/C5AR1/PREX1/ITGB2/IL17RA</i>           | 13 |
| GO:0042742 | defense response to bacterium                      | 0.062201 | 0.016684886 | 5.13E-05 | 3.81E-03 | 3.40E-03 | <i>PGLYRP4/S100A12/S100A8/NLRC4/SPINK5/DEFB103B/DEFB103A/C10orf99/RNASE7/NLRP1/C5AR1/KLK5/KLK7</i> | 13 |
| GO:0045861 | negative regulation of proteolysis                 | 0.062201 | 0.020021863 | 3.13E-04 | 1.71E-02 | 1.53E-02 | <i>ECM1/CR1/NLRC4/IL1R2/SPINK5/SPINK6/SPINK7/PII5/CST6/A2ML1/SERPINB7/CST1/MMP9</i>                | 13 |
| GO:0030099 | myeloid cell differentiation                       | 0.062201 | 0.022438295 | 9.09E-04 | 3.32E-02 | 2.96E-02 | <i>PIK3CD/CSF3R/INPP5D/SPI1/GAB2/FLI1/BMP4/PRKCB/EVI2B/RASGRP4/ZFP36/TGFB1/MMP9</i>                | 13 |
| GO:0002683 | negative regulation of immune system process       | 0.062201 | 0.023704045 | 1.49E-03 | 4.31E-02 | 3.85E-02 | <i>PADI2/MNDA/PTPRC/CR1/IL1RL1/INPP5D/SPINK5/PRDM1/BMP4/ZFP36/TGFB1/LILRA2/SAMSN1</i>              | 13 |
| GO:0071621 | granulocyte chemotaxis                             | 0.057416 | 0.00632875  | 8.34E-09 | 1.86E-06 | 1.66E-06 | <i>PIK3CD/CSF3R/S100A12/S100A8/CXCR2/CXCL2/JAML/ADGRE2/C5AR1/PREX1/ITGB2/IL17RA</i>                | 12 |
| GO:0010466 | negative regulation of peptidase activity          | 0.057416 | 0.015131465 | 8.45E-05 | 5.82E-03 | 5.20E-03 | <i>ECM1/CR1/NLRC4/SPINK5/SPINK6/SPINK7/PII5/CST6/A2ML1/SERPINB7/CST1/MMP9</i>                      | 12 |
| GO:0050673 | epithelial cell proliferation                      | 0.057416 | 0.020769806 | 1.46E-03 | 4.30E-02 | 3.84E-02 | <i>ECM1/CCR3/EREG/SLURP1/TEK/JAML/BMP4/DLL4/ZFP36/TGFB1/C5AR1/KLK8</i>                             | 12 |
| GO:1990266 | neutrophil migration                               | 0.052632 | 0.005810943 | 3.61E-08 | 7.45E-06 | 6.66E-06 | <i>PIK3CD/CSF3R/S100A12/S100A8/IL1A/CXCR2/CXCL2/JAML/C5AR1/PREX1/ITGB2</i>                         | 11 |
| GO:1904018 | positive regulation of vasculature development     | 0.052632 | 0.009665727 | 6.07E-06 | 7.98E-04 | 7.13E-04 | <i>ECM1/IL1A/CCR3/EGRI/NOS3/TEK/ITGA5/PRKCB/SERPINB7/C5AR1/ITGB2</i>                               | 11 |
| GO:0030217 | T cell differentiation                             | 0.052632 | 0.01294517  | 9.07E-05 | 6.11E-03 | 5.46E-03 | <i>PIK3CD/PTPRC/CR1/ZFP36L2/EGRI/SPINK5/PRDM1/BMP4/DLL4/TGFB1/PREX1</i>                            | 11 |
| GO:0042113 | B cell activation                                  | 0.052632 | 0.015591738 | 4.54E-04 | 2.15E-02 | 1.92E-02 | <i>PIK3CD/MNDA/PTPRC/ZFP36L2/INPP5D/PRDM1/PRKCB/PLCG2/TGFB1/SAMSN1/NFAM1</i>                       | 11 |
| GO:0045765 | regulation of angiogenesis                         | 0.052632 | 0.015706806 | 4.83E-04 | 2.25E-02 | 2.01E-02 | <i>ECM1/IL1A/CCR3/SPINK5/NOS3/TEK/ITGA5/DLL4/PRKCB/C5AR1/ITGB2</i>                                 | 11 |

|            |                                                                  |          |             |          |          |          |                                                                                   |    |
|------------|------------------------------------------------------------------|----------|-------------|----------|----------|----------|-----------------------------------------------------------------------------------|----|
| GO:0032103 | positive regulation of response to external stimulus             | 0.052632 | 0.016167079 | 6.14E-04 | 2.57E-02 | 2.30E-02 | <i>S100A12/S100A8/IL1RL1/CXCL2/AGER/TGFB1/C5AR1/KLK5/KLK7/THBD/IL17RA</i>         | 11 |
| GO:0050678 | regulation of epithelial cell proliferation                      | 0.052632 | 0.017662965 | 1.26E-03 | 4.01E-02 | 3.59E-02 | <i>ECM1/CCR3/EREG/SLURP1/TEK/JAML/BMP4/DLL4/ZFP36/TGFB1/C5AR1</i>                 | 11 |
| GO:0032496 | response to lipopolysaccharide                                   | 0.052632 | 0.018180772 | 1.59E-03 | 4.55E-02 | 4.06E-02 | <i>S100A8/CXCL2/PRDM1/NOS3/PLCG2/ZFP36/TGFB1/C5AR1/LILRA2/THBD/HCK</i>            | 11 |
| GO:0006959 | humoral immune response                                          | 0.052632 | 0.018468443 | 1.80E-03 | 4.97E-02 | 4.44E-02 | <i>PGLYRP4/S100A12/S100A8/CR1/SPINK5/DEFB103B/DEFB103A/RNASE7/C5AR1/KLK5/KLK7</i> | 11 |
| GO:0030593 | neutrophil chemotaxis                                            | 0.047847 | 0.005178068 | 1.26E-07 | 2.43E-05 | 2.18E-05 | <i>PIK3CD/CSF3R/S100A12/S100A8/CXCR2/CXCL2/JAML/C5AR1/PREX1/ITGB2</i>             | 10 |
| GO:0002703 | regulation of leukocyte mediated immunity                        | 0.047847 | 0.009493125 | 3.15E-05 | 2.68E-03 | 2.40E-03 | <i>PTPRC/CR1/AGER/GAB2/UNC13D/PRAM1/ADGRE2/TGFB1/ITGB2/WAS</i>                    | 10 |
| GO:0051091 | positive regulation of DNA binding transcription factor activity | 0.047847 | 0.014153386 | 8.11E-04 | 3.17E-02 | 2.83E-02 | <i>S100A12/S100A8/NLRC4/AGER/RELN/PRKCB/CARD14/TGFB1/ITGB2/NFAM1</i>              | 10 |
| GO:0010951 | negative regulation of endopeptidase activity                    | 0.047847 | 0.014383522 | 9.17E-04 | 3.32E-02 | 2.96E-02 | <i>CR1/NLRC4/SPINK5/SPINK6/SPINK7/CST6/A2ML1/SERPIN7/CST1/MMP9</i>                | 10 |
| GO:1902105 | regulation of leukocyte differentiation                          | 0.047847 | 0.014613659 | 1.03E-03 | 3.61E-02 | 3.22E-02 | <i>CR1/ZFP36L2/INPP5D/SPINK5/AGER/PRDM1/BMP4/EVI2B/TGFB1/NFAM1</i>                | 10 |
| GO:0050851 | antigen receptor-mediated signaling pathway                      | 0.047847 | 0.014786261 | 1.13E-03 | 3.80E-02 | 3.40E-02 | <i>PIK3CD/THEMIS2/MNDA/PTPRC/INPP5D/FYB1/PRKCB/PLCG2/NFAM1/WAS</i>                | 10 |
| GO:0019730 | antimicrobial humoral response                                   | 0.043062 | 0.006041079 | 4.90E-06 | 7.09E-04 | 6.34E-04 | <i>PGLYRP4/S100A12/S100A8/SPINK5/DEFB103B/DEFB103A/RNASE7/KLK5/KLK7</i>           | 9  |
| GO:0045766 | positive regulation of angiogenesis                              | 0.043062 | 0.008457511 | 7.27E-05 | 5.13E-03 | 4.59E-03 | <i>ECM1/IL1A/CCR3/NOS3/TEK/ITGA5/PRKCB/C5AR1/ITGB2</i>                            | 9  |
| GO:0018149 | peptide cross-linking                                            | 0.038278 | 0.003394511 | 5.01E-07 | 8.05E-05 | 7.19E-05 | <i>FLG/LCE3E/LCE3D/SPRR3/SPRR2D/SPRR2B/SPRR2E/SPRR2F</i>                          | 8  |
| GO:0051092 | positive regulation of NF-kappaB transcription factor activity   | 0.038278 | 0.008054772 | 2.94E-04 | 1.64E-02 | 1.46E-02 | <i>S100A12/S100A8/NLRC4/AGER/PRKCB/CARD14/TGFB1/ITGB2</i>                         | 8  |
| GO:0050864 | regulation of B cell activation                                  | 0.038278 | 0.008917784 | 5.81E-04 | 2.51E-02 | 2.24E-02 | <i>MNDA/PTPRC/ZFP36L2/INPP5D/PRDM1/TGFB1/SAMSN1/NFAM1</i>                         | 8  |



|            |                                                                         |          |             |          |          |          |                                                            |   |
|------------|-------------------------------------------------------------------------|----------|-------------|----------|----------|----------|------------------------------------------------------------|---|
| GO:0045619 | regulation of lymphocyte differentiation                                | 0.038278 | 0.008975318 | 6.06E-04 | 2.57E-02 | 2.30E-02 | <i>CRI/ZFP36L2/INPP5D/SPINK5/PRDM1/BMP4/TGFB1/NFAM1</i>    | 8 |
| GO:0050866 | negative regulation of cell activation                                  | 0.038278 | 0.010010931 | 1.23E-03 | 3.99E-02 | 3.57E-02 | <i>MNDA/INPP5D/PRDM1/NOS3/BMP4/TGFB1/THBD/SAMSN1</i>       | 8 |
| GO:0007492 | endoderm development                                                    | 0.033493 | 0.004545193 | 4.58E-05 | 3.49E-03 | 3.12E-03 | <i>DUSP1/ARC/ITGA5/BMP4/TGFB1/MMP9/ITGB2</i>               | 7 |
| GO:0001704 | formation of primary germ layer                                         | 0.033493 | 0.007249295 | 8.30E-04 | 3.20E-02 | 2.86E-02 | <i>DUSP1/ITGA5/BMP4/KDM6B/MMP9/SNAI1/ITGB2</i>             | 7 |
| GO:0050777 | negative regulation of immune response                                  | 0.033493 | 0.0075945   | 1.09E-03 | 3.71E-02 | 3.32E-02 | <i>PTPRC/CRI/IL1RL1/INPP5D/SPINK5/TGFB1/SAMSN1</i>         | 7 |
| GO:0002819 | regulation of adaptive immune response                                  | 0.033493 | 0.007767102 | 1.24E-03 | 3.99E-02 | 3.57E-02 | <i>PTPRC/CRI/IL1RL1/AGER/TGFB1/SAMSN1/WAS</i>              | 7 |
| GO:0001906 | cell killing                                                            | 0.033493 | 0.007997238 | 1.47E-03 | 4.30E-02 | 3.84E-02 | <i>PGLYRP4/S100A12/PTPRC/AGER/DEFB103B/DEFB103A/UNC13D</i> | 7 |
| GO:0072006 | nephron development                                                     | 0.033493 | 0.007939704 | 1.41E-03 | 4.30E-02 | 3.84E-02 | <i>EGR1/CALB1/TEK/ACTA2/BMP4/SERPINB7/TGFB1</i>            | 7 |
| GO:0050832 | defense response to fungus                                              | 0.028708 | 0.002301364 | 7.68E-06 | 9.66E-04 | 8.63E-04 | <i>S100A12/S100A8/C10orf99/RNASE7/TGFB1/IL17RA</i>         | 6 |
| GO:0009620 | response to fungus                                                      | 0.028708 | 0.003106841 | 4.49E-05 | 3.49E-03 | 3.12E-03 | <i>S100A12/S100A8/C10orf99/RNASE7/TGFB1/IL17RA</i>         | 6 |
| GO:0061844 | antimicrobial humoral immune response mediated by antimicrobial peptide | 0.028708 | 0.003106841 | 4.49E-05 | 3.49E-03 | 3.12E-03 | <i>PGLYRP4/S100A12/SPINK5/RNASE7/KLK5/KLK7</i>             | 6 |
| GO:0050830 | defense response to Gram-positive bacterium                             | 0.028708 | 0.005235602 | 8.02E-04 | 3.17E-02 | 2.83E-02 | <i>PGLYRP4/DEFB103B/DEFB103A/C10orf99/RNASE7/C5AR1</i>     | 6 |
| GO:0050853 | B cell receptor signaling pathway                                       | 0.028708 | 0.005293136 | 8.50E-04 | 3.21E-02 | 2.87E-02 | <i>PIK3CD/MNDA/PTPRC/PRKCB/PLCG2/NFAM1</i>                 | 6 |
| GO:0007613 | memory                                                                  | 0.028708 | 0.006098613 | 1.77E-03 | 4.97E-02 | 4.44E-02 | <i>HRH2/RELN/CALB1/ARC/ITGA5/KLK8</i>                      | 6 |
| GO:0072012 | glomerulus vasculature development                                      | 0.023923 | 0.001438352 | 1.05E-05 | 1.23E-03 | 1.10E-03 | <i>EGR1/TEK/ACTA2/BMP4/SERPINB7</i>                        | 5 |
| GO:0061437 | renal system vasculature development                                    | 0.023923 | 0.00155342  | 1.56E-05 | 1.56E-03 | 1.39E-03 | <i>EGR1/TEK/ACTA2/BMP4/SERPINB7</i>                        | 5 |
| GO:0061440 | kidney vasculature development                                          | 0.023923 | 0.00155342  | 1.56E-05 | 1.56E-03 | 1.39E-03 | <i>EGR1/TEK/ACTA2/BMP4/SERPINB7</i>                        | 5 |

|            |                                                           |          |             |          |          |          |                                          |   |
|------------|-----------------------------------------------------------|----------|-------------|----------|----------|----------|------------------------------------------|---|
| GO:0002886 | regulation of myeloid leukocyte mediated immunity         | 0.023923 | 0.0025315   | 1.78E-04 | 1.12E-02 | 9.99E-03 | <i>GAB2/UNC13D/PRAMI/ADGRE2/ITGB2</i>    | 5 |
| GO:0043300 | regulation of leukocyte degranulation                     | 0.023923 | 0.0025315   | 1.78E-04 | 1.12E-02 | 9.99E-03 | <i>GAB2/UNC13D/PRAMI/ADGRE2/ITGB2</i>    | 5 |
| GO:0045123 | cellular extravasation                                    | 0.023923 | 0.002876704 | 3.27E-04 | 1.74E-02 | 1.56E-02 | <i>PIK3CD/IL1A/JAML/SELPLG/ITGB2</i>     | 5 |
| GO:0031663 | lipopolysaccharide-mediated signaling pathway             | 0.023923 | 0.003049307 | 4.30E-04 | 2.14E-02 | 1.91E-02 | <i>PRDM1/NOS3/TGFB1/LILRA2/HCK</i>       | 5 |
| GO:0045576 | mast cell activation                                      | 0.023923 | 0.003221909 | 5.56E-04 | 2.48E-02 | 2.22E-02 | <i>PIK3CD/S100A12/GAB2/UNC13D/ADGRE2</i> | 5 |
| GO:0006968 | cellular defense response                                 | 0.023923 | 0.003452045 | 7.65E-04 | 3.07E-02 | 2.75E-02 | <i>MNDA/CXCR2/CCR3/LSP1/CSAR1</i>        | 5 |
| GO:0032835 | glomerulus development                                    | 0.023923 | 0.003624648 | 9.56E-04 | 3.37E-02 | 3.02E-02 | <i>EGR1/TEK/ACTA2/BMP4/SERPINB7</i>      | 5 |
| GO:0032945 | negative regulation of mononuclear cell proliferation     | 0.023923 | 0.003969852 | 1.44E-03 | 4.30E-02 | 3.84E-02 | <i>MNDA/INPP5D/PRDM1/BMP4/TGFB1</i>      | 5 |
| GO:0050672 | negative regulation of lymphocyte proliferation           | 0.023923 | 0.003969852 | 1.44E-03 | 4.30E-02 | 3.84E-02 | <i>MNDA/INPP5D/PRDM1/BMP4/TGFB1</i>      | 5 |
| GO:1900004 | negative regulation of serine-type endopeptidase activity | 0.019139 | 0.000747943 | 1.33E-05 | 1.43E-03 | 1.28E-03 | <i>CRI/SPINK5/SPINK6/SPINK7</i>          | 4 |
| GO:1902572 | negative regulation of serine-type peptidase activity     | 0.019139 | 0.000747943 | 1.33E-05 | 1.43E-03 | 1.28E-03 | <i>CRI/SPINK5/SPINK6/SPINK7</i>          | 4 |
| GO:0072109 | glomerular mesangium development                          | 0.019139 | 0.000863011 | 2.50E-05 | 2.19E-03 | 1.96E-03 | <i>EGR1/ACTA2/BMP4/SERPINB7</i>          | 4 |
| GO:1900003 | regulation of serine-type endopeptidase activity          | 0.019139 | 0.000863011 | 2.50E-05 | 2.19E-03 | 1.96E-03 | <i>CRI/SPINK5/SPINK6/SPINK7</i>          | 4 |
| GO:1902571 | regulation of serine-type peptidase activity              | 0.019139 | 0.000863011 | 2.50E-05 | 2.19E-03 | 1.96E-03 | <i>CRI/SPINK5/SPINK6/SPINK7</i>          | 4 |
| GO:0045577 | regulation of B cell differentiation                      | 0.019139 | 0.001495886 | 2.47E-04 | 1.49E-02 | 1.33E-02 | <i>ZFP36L2/INPP5D/PRDM1/NFAM1</i>        | 4 |

|            |                                                                       |          |             |          |          |          |                                     |   |
|------------|-----------------------------------------------------------------------|----------|-------------|----------|----------|----------|-------------------------------------|---|
| GO:0001958 | endochondral ossification                                             | 0.019139 | 0.00155342  | 2.87E-04 | 1.63E-02 | 1.45E-02 | <i>CSGALNACT1/TEK/BMP4/PHOSPHO1</i> | 4 |
| GO:0036075 | replacement ossification                                              | 0.019139 | 0.00155342  | 2.87E-04 | 1.63E-02 | 1.45E-02 | <i>CSGALNACT1/TEK/BMP4/PHOSPHO1</i> | 4 |
| GO:0061311 | cell surface receptor signaling pathway involved in heart development | 0.019139 | 0.001610954 | 3.32E-04 | 1.74E-02 | 1.56E-02 | <i>BMP4/DLL4/TGFB1/SNAI1</i>        | 4 |
| GO:1900271 | regulation of long-term synaptic potentiation                         | 0.019139 | 0.001726023 | 4.36E-04 | 2.14E-02 | 1.91E-02 | <i>AGER/RELN/CALB1/ARC</i>          | 4 |
| GO:0050869 | negative regulation of B cell activation                              | 0.019139 | 0.001783557 | 4.96E-04 | 2.28E-02 | 2.03E-02 | <i>MNDA/INPP5D/PRDM1/SAMSN1</i>     | 4 |
| GO:0043616 | keratinocyte proliferation                                            | 0.019139 | 0.002243829 | 1.20E-03 | 3.99E-02 | 3.57E-02 | <i>EREG/SLURP1/ZFP36/KLK8</i>       | 4 |
| GO:0090184 | positive regulation of kidney development                             | 0.019139 | 0.002301364 | 1.32E-03 | 4.16E-02 | 3.72E-02 | <i>EGR1/BMP4/SERPINB7/TGFB1</i>     | 4 |
| GO:0002820 | negative regulation of adaptive immune response                       | 0.019139 | 0.002358898 | 1.45E-03 | 4.30E-02 | 3.84E-02 | <i>PTPRC/CRI/IL1RL1/SAMSN1</i>      | 4 |
| GO:0072110 | glomerular mesangial cell proliferation                               | 0.014354 | 0.000575341 | 1.93E-04 | 1.19E-02 | 1.06E-02 | <i>EGR1/BMP4/SERPINB7</i>           | 3 |
| GO:0072672 | neutrophil extravasation                                              | 0.014354 | 0.000632875 | 2.63E-04 | 1.55E-02 | 1.39E-02 | <i>PIK3CD/IL1A/JAML</i>             | 3 |
| GO:1901722 | regulation of cell proliferation involved in kidney development       | 0.014354 | 0.000747943 | 4.48E-04 | 2.15E-02 | 1.92E-02 | <i>EGR1/BMP4/SERPINB7</i>           | 3 |
| GO:0090192 | regulation of glomerulus development                                  | 0.014354 | 0.000805477 | 5.66E-04 | 2.48E-02 | 2.22E-02 | <i>EGR1/BMP4/SERPINB7</i>           | 3 |
| GO:1900424 | regulation of defense response to bacterium                           | 0.014354 | 0.000805477 | 5.66E-04 | 2.48E-02 | 2.22E-02 | <i>SPINK5/KLK5/KLK7</i>             | 3 |
| GO:0030889 | negative regulation of B cell proliferation                           | 0.014354 | 0.000920545 | 8.55E-04 | 3.21E-02 | 2.87E-02 | <i>MNDA/INPP5D/PRDM1</i>            | 3 |
| GO:0097709 | connective tissue replacement                                         | 0.014354 | 0.001035614 | 1.22E-03 | 3.99E-02 | 3.57E-02 | <i>IL1A/AGER/TGFB1</i>              | 3 |

|            |                                                   |          |             |          |          |          |                           |   |
|------------|---------------------------------------------------|----------|-------------|----------|----------|----------|---------------------------|---|
| GO:0072111 | cell proliferation involved in kidney development | 0.014354 | 0.001150682 | 1.68E-03 | 4.76E-02 | 4.26E-02 | <i>EGRI/BMP4/SERPINB7</i> | 3 |
|------------|---------------------------------------------------|----------|-------------|----------|----------|----------|---------------------------|---|

Table S4: Molecular functions enriched at baseline between “Cold” and “No Cold” groups

| ID         | Description                              | GeneRatio   | BgRatio     | Pvalue   | P.adjust | qvalue   | geneID                                                                                       | Count |
|------------|------------------------------------------|-------------|-------------|----------|----------|----------|----------------------------------------------------------------------------------------------|-------|
| GO:0017171 | serine hydrolase activity                | 0.0591133   | 0.015961738 | 1.06E-04 | 7.29E-03 | 6.50E-03 | <i>TMPRSS11B/TMPRSS11E/RELN/CTSV/PRSS27/KLK5/KLK6/KLK7/KLK8/KLK12/KLK13/MMP9</i>             | 12    |
| GO:0008236 | serine-type peptidase activity           | 0.0591133   | 0.01567362  | 8.93E-05 | 7.29E-03 | 6.50E-03 | <i>TMPRSS11B/TMPRSS11E/RELN/CTSV/PRSS27/KLK5/KLK6/KLK7/KLK8/KLK12/KLK13/MMP9</i>             | 12    |
| GO:0004252 | serine-type endopeptidase activity       | 0.054187192 | 0.014060159 | 1.45E-04 | 8.28E-03 | 7.38E-03 | <i>TMPRSS11B/TMPRSS11E/CTSV/PRSS27/KLK5/KLK6/KLK7/KLK8/KLK12/KLK13/MMP9</i>                  | 11    |
| GO:0061134 | peptidase regulator activity             | 0.054187192 | 0.012561945 | 5.33E-05 | 7.29E-03 | 6.50E-03 | <i>NLRC4/MAL/SPINK5/SPINK6/SPINK7/PI15/CST6/A2ML1/NLRP1/SERPINB7/CST1</i>                    | 11    |
| GO:0030414 | peptidase inhibitor activity             | 0.044334975 | 0.010487496 | 2.97E-04 | 1.36E-02 | 1.21E-02 | <i>NLRC4/SPINK5/SPINK6/SPINK7/PI15/CST6/A2ML1/SERPINB7/CST1</i>                              | 9     |
| GO:0019955 | cytokine binding                         | 0.039408867 | 0.005819984 | 2.43E-05 | 5.01E-03 | 4.47E-03 | <i>CSF3R/IL1R2/IL1RL1/CXCR2/CXCR1/CCR3/ZFP36/IL2RG</i>                                       | 8     |
| GO:0004896 | cytokine receptor activity               | 0.039408867 | 0.005243748 | 1.13E-05 | 4.66E-03 | 4.15E-03 | <i>CSF3R/IL1R2/IL1RL1/CXCR2/CXCR1/CCR3/IL17RA/IL2RG</i>                                      | 8     |
| GO:0070851 | growth factor receptor binding           | 0.034482759 | 0.007606316 | 9.29E-04 | 3.15E-02 | 2.81E-02 | <i>ECM1/IL1A/IL36G/REG/EBEGF/AGR2/ITGA5</i>                                                  | 7     |
| GO:0005154 | epidermal growth factor receptor binding | 0.019704433 | 0.001901579 | 5.70E-04 | 2.14E-02 | 1.90E-02 | <i>REG/EBEGF/AGR2/ITGA5</i>                                                                  | 4     |
| GO:0019956 | chemokine binding                        | 0.019704433 | 0.001382966 | 1.61E-04 | 8.28E-03 | 7.38E-03 | <i>CXCR2/CXCR1/CCR3/ZFP36</i>                                                                | 4     |
| GO:0001848 | complement binding                       | 0.019704433 | 0.001210096 | 9.31E-05 | 7.29E-03 | 6.50E-03 | <i>CR1/C5AR1/CD93/ITGB2</i>                                                                  | 4     |
| GO:0001846 | opsonin binding                          | 0.014778325 | 0.00080673  | 5.22E-04 | 2.14E-02 | 1.90E-02 | <i>CR1/CD93/ITGB2</i>                                                                        | 3     |
| GO:0004175 | endopeptidase activity                   | 0.068965517 | 0.02702547  | 1.28E-03 | 3.52E-02 | 3.14E-02 | <i>CLCA4/ASPRV1/MME/TMPRSS11B/TMPRSS11E/CTSV/PRSS27/KLK5/KLK6/KLK7/KLK8/KLK12/KLK13/MMP9</i> | 14    |
| GO:0061135 | endopeptidase regulator activity         | 0.039408867 | 0.010314625 | 1.24E-03 | 3.52E-02 | 3.14E-02 | <i>NLRC4/SPINK5/SPINK6/SPINK7/CST6/A2ML1/SERPINB7/CST1</i>                                   | 8     |
| GO:0004866 | endopeptidase inhibitor activity         | 0.039408867 | 0.009968883 | 9.95E-04 | 3.15E-02 | 2.81E-02 | <i>NLRC4/SPINK5/SPINK6/SPINK7/CST6/A2ML1/SERPINB7/CST1</i>                                   | 8     |

| <b>Mediator</b><br>(log <sub>10</sub> pg/ml) | <b>Cold</b> (n=23, unless<br>otherwise stated)<br>Median | <b>No Cold</b> (n=25, unless<br>otherwise stated)<br>Median | <i>P</i> -value |
|----------------------------------------------|----------------------------------------------------------|-------------------------------------------------------------|-----------------|
| IFN- $\alpha$                                | 0.046                                                    | 0.046                                                       | 0.176           |
| IFN- $\beta$                                 | 1.866                                                    | 0.856                                                       | 0.617           |
| IFN- $\gamma$                                | 0                                                        | 0                                                           | 0.314           |
| IL-1 $\beta$                                 | 1.193                                                    | 0.870                                                       | 0.086           |
| IL-6                                         | 0.991                                                    | 0.659                                                       | 0.103           |
| IL-8                                         | 3.170                                                    | 2.923                                                       | 0.356           |
| IL-10                                        | 0.803                                                    | 0.803                                                       | 0.068           |
| IL-15                                        | 0.419                                                    | 0.329                                                       | 0.391           |
| IL-17A                                       | 0.609                                                    | 0.144                                                       | 0.039*          |
| CXCL10<br>(IP-10)                            | 1.991                                                    | 1.715                                                       | 0.054           |
| LCN-2                                        | 6.704 (n=10)                                             | 5.875 (n=9)                                                 | 0.017*          |
| MIP-1 $\alpha$                               | 0.903                                                    | 0.732                                                       | 0.192           |
| MPO                                          | 6.758 (n=10)                                             | 5.861 (n=9)                                                 | 0.010*          |
| CCL5<br>(RANTES)                             | 0.254                                                    | 0.369                                                       | 0.665           |
| TNF- $\alpha$                                | 0                                                        | 0                                                           | 0.692           |

**Table S5: Day 0 cytokine levels in infected and uninfected volunteers** Day 0 mediator levels in the upper respiratory tract were determined in participants who subsequently developed symptomatic RSV infection (Cold, n=23) and those that did not (No Cold, n=25). Statistical analyses used two-tailed Mann Whitney *U* tests; \**P*<0.05.

Table S6: DEGs between day 3 and day 0 in the “No Cold” group ( $P$ -value<0.01, LFC>0.5)

|                 | GeneName             | baseMean | log <sup>2</sup> Fold Change | lfcSE    | stat     | Pvalue   | Padj     |
|-----------------|----------------------|----------|------------------------------|----------|----------|----------|----------|
| ENSG00000268173 | <i>AC007192.4</i>    | 34.09618 | 10.71285                     | 1.946479 | 5.503707 | 3.72E-08 | 0.000546 |
| ENSG00000163734 | <i>CXCL3</i>         | 149.3781 | 1.440807                     | 0.321685 | 4.478942 | 7.50E-06 | 0.055023 |
| ENSG00000081041 | <i>CXCL2</i>         | 174.802  | 1.436306                     | 0.349674 | 4.107556 | 4.00E-05 | 0.195535 |
| ENSG00000177606 | <i>JUN</i>           | 1314.332 | 0.725754                     | 0.189651 | 3.826781 | 0.00013  | 0.274872 |
| ENSG00000163739 | <i>CXCL1</i>         | 1567.606 | 1.058814                     | 0.272342 | 3.887809 | 0.000101 | 0.274872 |
| ENSG00000159231 | <i>CBR3</i>          | 89.53077 | -0.80421                     | 0.21029  | -3.82427 | 0.000131 | 0.274872 |
| ENSG00000140519 | <i>RHCG</i>          | 205.5315 | 2.384514                     | 0.629577 | 3.787487 | 0.000152 | 0.279058 |
| ENSG00000143536 | <i>CRNN</i>          | 332.3173 | 2.42925                      | 0.700976 | 3.465527 | 0.000529 | 0.644422 |
| ENSG00000137331 | <i>IER3</i>          | 1131.598 | 0.773632                     | 0.225847 | 3.425471 | 0.000614 | 0.644422 |
| ENSG00000123119 | <i>NECAB1</i>        | 17.4312  | 1.396028                     | 0.40761  | 3.424915 | 0.000615 | 0.644422 |
| ENSG00000196993 | <i>NPIP9</i>         | 90.3268  | -0.60766                     | 0.177412 | -3.42512 | 0.000615 | 0.644422 |
| ENSG00000169203 | <i>RP11-231C14.4</i> | 249.1964 | -0.64802                     | 0.187268 | -3.46041 | 0.000539 | 0.644422 |
| ENSG00000280893 | <i>AC009133.23</i>   | 9.701738 | -2.5609                      | 0.758312 | -3.3771  | 0.000733 | 0.691727 |
| ENSG00000067082 | <i>KLF6</i>          | 1426.194 | 0.520046                     | 0.157306 | 3.305947 | 0.000947 | 0.694302 |
| ENSG00000186474 | <i>KLK12</i>         | 25.34081 | 1.839293                     | 0.551663 | 3.334085 | 0.000856 | 0.694302 |
| ENSG00000113070 | <i>HBEGF</i>         | 259.5387 | 1.320102                     | 0.402212 | 3.282104 | 0.00103  | 0.719647 |
| ENSG00000091128 | <i>LAMB4</i>         | 79.02638 | 1.205408                     | 0.370164 | 3.256417 | 0.001128 | 0.719647 |
| ENSG00000132932 | <i>ATP8A2</i>        | 24.55841 | 0.602019                     | 0.184236 | 3.267642 | 0.001084 | 0.719647 |
| ENSG00000139318 | <i>DUSP6</i>         | 775.636  | 0.686782                     | 0.215349 | 3.189164 | 0.001427 | 0.807516 |
| ENSG00000203852 | <i>HIST2H3A</i>      | 311.1639 | 1.57602                      | 0.502519 | 3.136242 | 0.001711 | 0.838019 |
| ENSG00000165794 | <i>SLC39A2</i>       | 27.49601 | 1.602373                     | 0.51099  | 3.135821 | 0.001714 | 0.838019 |
| ENSG00000154734 | <i>ADAMTS1</i>       | 34.50457 | 1.779                        | 0.565144 | 3.147873 | 0.001645 | 0.838019 |
| ENSG00000183336 | <i>BOLA2</i>         | 5.369005 | -9.99524                     | 3.22335  | -3.10089 | 0.001929 | 0.913049 |
| ENSG00000121742 | <i>GJB6</i>          | 75.14953 | 1.351585                     | 0.437849 | 3.086874 | 0.002023 | 0.923257 |
| ENSG00000265590 | <i>AP000275.65</i>   | 33.19193 | -1.87079                     | 0.607592 | -3.07902 | 0.002077 | 0.923257 |
| ENSG00000169509 | <i>CRCT1</i>         | 43.10019 | 2.246315                     | 0.786001 | 2.857904 | 0.004264 | 0.971488 |
| ENSG00000090104 | <i>RGS1</i>          | 260.8477 | 0.758897                     | 0.261628 | 2.900676 | 0.003724 | 0.971488 |
| ENSG00000263961 | <i>C1orf186</i>      | 9.726597 | 1.104421                     | 0.381009 | 2.898677 | 0.003747 | 0.971488 |
| ENSG00000143878 | <i>RHOB</i>          | 1806.952 | 0.509216                     | 0.179492 | 2.83699  | 0.004554 | 0.971488 |
| ENSG00000115602 | <i>IL1RL1</i>        | 51.0304  | 1.606061                     | 0.559536 | 2.870347 | 0.0041   | 0.971488 |
| ENSG00000185873 | <i>TMPRSS11B</i>     | 126.1337 | 2.320712                     | 0.77744  | 2.98507  | 0.002835 | 0.971488 |
| ENSG00000124875 | <i>CXCL6</i>         | 692.2134 | 0.849458                     | 0.286733 | 2.962539 | 0.003051 | 0.971488 |
| ENSG00000145879 | <i>SPINK7</i>        | 90.93384 | 2.305832                     | 0.75561  | 3.051617 | 0.002276 | 0.971488 |
| ENSG00000112394 | <i>SLC16A10</i>      | 25.4085  | 1.106001                     | 0.3716   | 2.976325 | 0.002917 | 0.971488 |
| ENSG00000155918 | <i>RAET1L</i>        | 74.83194 | 1.296183                     | 0.451471 | 2.871022 | 0.004091 | 0.971488 |
| ENSG00000197181 | <i>PIWIL2</i>        | 16.37803 | 0.889869                     | 0.298332 | 2.982817 | 0.002856 | 0.971488 |
| ENSG00000104368 | <i>PLAT</i>          | 1629.246 | 1.266039                     | 0.433067 | 2.923424 | 0.003462 | 0.971488 |
| ENSG00000111215 | <i>PRR4</i>          | 92.77336 | -0.82179                     | 0.277502 | -2.96137 | 0.003063 | 0.971488 |
| ENSG00000018236 | <i>CNTN1</i>         | 68.40497 | 0.892821                     | 0.307411 | 2.904322 | 0.00368  | 0.971488 |
| ENSG00000279777 | <i>AC004813.1</i>    | 52.62626 | -0.60351                     | 0.20639  | -2.92413 | 0.003454 | 0.971488 |
| ENSG00000128965 | <i>CHAC1</i>         | 76.63318 | 0.803606                     | 0.281341 | 2.856341 | 0.004286 | 0.971488 |

|                 |                       |          |          |          |          |          |          |
|-----------------|-----------------------|----------|----------|----------|----------|----------|----------|
| ENSG00000185864 | <i>NPIP4</i>          | 335.7528 | -0.52362 | 0.177264 | -2.95391 | 0.003138 | 0.971488 |
| ENSG00000171401 | <i>KRT13</i>          | 3674.625 | 1.533781 | 0.527322 | 2.908621 | 0.00363  | 0.971488 |
| ENSG00000175906 | <i>ARL4D</i>          | 476.1744 | 0.578185 | 0.203438 | 2.842066 | 0.004482 | 0.971488 |
| ENSG00000269404 | <i>SPIB</i>           | 27.53031 | 0.814364 | 0.278475 | 2.924367 | 0.003452 | 0.971488 |
| ENSG00000169035 | <i>KLK7</i>           | 193.8601 | 1.85068  | 0.640657 | 2.888722 | 0.003868 | 0.971488 |
| ENSG00000129455 | <i>KLK8</i>           | 26.1473  | 2.13996  | 0.750293 | 2.852164 | 0.004342 | 0.971488 |
| ENSG00000088882 | <i>CPXM1</i>          | 53.04393 | 0.761404 | 0.266631 | 2.855645 | 0.004295 | 0.971488 |
| ENSG00000156282 | <i>CLDN17</i>         | 19.61386 | 2.754695 | 0.950417 | 2.898406 | 0.003751 | 0.971488 |
| ENSG00000128342 | <i>LIF</i>            | 164.0332 | 0.589717 | 0.206526 | 2.855406 | 0.004298 | 0.971488 |
| ENSG00000163751 | <i>CPA3</i>           | 103.1778 | 1.764197 | 0.637979 | 2.765291 | 0.005687 | 0.990244 |
| ENSG00000188818 | <i>ZDHHC11</i>        | 88.32456 | -0.54877 | 0.198388 | -2.76616 | 0.005672 | 0.990244 |
| ENSG00000136943 | <i>CTSV</i>           | 147.4117 | 0.920501 | 0.328398 | 2.803004 | 0.005063 | 0.990244 |
| ENSG00000188070 | <i>C11orf95</i>       | 136.192  | 0.50528  | 0.181364 | 2.785993 | 0.005336 | 0.990244 |
| ENSG00000170426 | <i>SDR9C7</i>         | 8.854919 | 2.309243 | 0.821713 | 2.81028  | 0.00495  | 0.990244 |
| ENSG00000166211 | <i>SPIC</i>           | 20.23969 | 0.594662 | 0.215019 | 2.765632 | 0.005681 | 0.990244 |
| ENSG00000165799 | <i>RNASE7</i>         | 49.36023 | 1.409505 | 0.504665 | 2.792952 | 0.005223 | 0.990244 |
| ENSG00000197253 | <i>TPSB2</i>          | 75.30485 | 1.871105 | 0.675495 | 2.769975 | 0.005606 | 0.990244 |
| ENSG00000198156 | <i>NPIP6</i>          | 98.34868 | -0.54924 | 0.198827 | -2.76241 | 0.005738 | 0.990244 |
| ENSG00000269711 | <i>CTD-3214H19.16</i> | 10.41424 | 10.46232 | 3.708287 | 2.821336 | 0.004782 | 0.990244 |
| ENSG00000105427 | <i>CNFN</i>           | 181.4197 | 1.277771 | 0.454088 | 2.813927 | 0.004894 | 0.990244 |
| ENSG00000022556 | <i>NLRP2</i>          | 93.76168 | 1.077863 | 0.386322 | 2.790064 | 0.00527  | 0.990244 |
| ENSG00000142619 | <i>PADI3</i>          | 97.15799 | 0.547472 | 0.20942  | 2.614223 | 0.008943 | 1        |
| ENSG00000143556 | <i>S100A7</i>         | 630.9285 | 1.955151 | 0.744234 | 2.627063 | 0.008613 | 1        |
| ENSG00000196754 | <i>S100A2</i>         | 4500.136 | 1.346063 | 0.492669 | 2.732187 | 0.006292 | 1        |
| ENSG00000179914 | <i>ITLN1</i>          | 48.25683 | -1.69569 | 0.651444 | -2.60297 | 0.009242 | 1        |
| ENSG00000135919 | <i>SERPINE2</i>       | 144.2735 | 1.144279 | 0.440156 | 2.599711 | 0.00933  | 1        |
| ENSG00000132465 | <i>JCHAIN</i>         | 62.01675 | 0.908242 | 0.345234 | 2.630798 | 0.008518 | 1        |
| ENSG00000118785 | <i>SPP1</i>           | 24.56759 | 1.089926 | 0.412914 | 2.639595 | 0.008301 | 1        |
| ENSG00000120738 | <i>EGR1</i>           | 360.8778 | 1.082594 | 0.406853 | 2.660894 | 0.007793 | 1        |
| ENSG00000254245 | <i>PCDHGA3</i>        | 16.88847 | -0.81997 | 0.308613 | -2.65694 | 0.007885 | 1        |
| ENSG00000253159 | <i>PCDHGA12</i>       | 23.25894 | -0.70802 | 0.257928 | -2.74503 | 0.006051 | 1        |
| ENSG00000133710 | <i>SPINK5</i>         | 1205.992 | 0.789563 | 0.296293 | 2.664807 | 0.007703 | 1        |
| ENSG00000120149 | <i>MSX2</i>           | 27.93288 | 0.635925 | 0.244592 | 2.599942 | 0.009324 | 1        |
| ENSG00000276180 | <i>HIST1H4I</i>       | 123.343  | 0.605086 | 0.230213 | 2.62837  | 0.00858  | 1        |
| ENSG00000170667 | <i>RASA4B</i>         | 32.38069 | -0.65927 | 0.252296 | -2.61307 | 0.008973 | 1        |
| ENSG00000164604 | <i>GPR85</i>          | 21.83782 | 0.745677 | 0.286781 | 2.600157 | 0.009318 | 1        |
| ENSG00000107984 | <i>DKK1</i>           | 176.808  | 0.807979 | 0.297051 | 2.720003 | 0.006528 | 1        |
| ENSG00000117983 | <i>MUC5B</i>          | 72.21829 | -1.39958 | 0.515548 | -2.71474 | 0.006633 | 1        |
| ENSG00000175518 | <i>UBQLNL</i>         | 18.33565 | -0.77311 | 0.288423 | -2.68046 | 0.007352 | 1        |
| ENSG00000165474 | <i>GJB2</i>           | 526.7655 | 0.911625 | 0.347925 | 2.620178 | 0.008788 | 1        |
| ENSG00000134901 | <i>KDELC1</i>         | 36.77971 | 0.505743 | 0.196205 | 2.577628 | 0.009948 | 1        |
| ENSG00000249240 | <i>AC069368.3</i>     | 5.588089 | -1.7672  | 0.665496 | -2.65546 | 0.00792  | 1        |
| ENSG00000188508 | <i>KRTDAP</i>         | 20.60571 | 2.121478 | 0.781522 | 2.714549 | 0.006637 | 1        |
| ENSG00000102313 | <i>ITIH6</i>          | 35.36962 | -0.71756 | 0.263563 | -2.72252 | 0.006479 | 1        |



|                 |               |          |          |          |          |          |   |
|-----------------|---------------|----------|----------|----------|----------|----------|---|
| ENSG00000268089 | <i>GABRQ</i>  | 21.23443 | 1.933114 | 0.706636 | 2.73566  | 0.006226 | 1 |
| ENSG00000198763 | <i>MT-ND2</i> | 2776.095 | -0.57408 | 0.215711 | -2.66133 | 0.007783 | 1 |

Table S7: DEGs between day 3 and day 0 in the “Cold” group ( $P$ -value<0.01, LFC>0.5)

|                 | GeneName         | baseMean | log <sup>2</sup> Fold Change | lfcSE    | stat     | Pvalue   | Padj     |
|-----------------|------------------|----------|------------------------------|----------|----------|----------|----------|
| ENSG00000125378 | <i>BMP4</i>      | 22.04009 | 1.543324                     | 0.297741 | 5.183448 | 2.18E-07 | 0.003195 |
| ENSG00000132326 | <i>PER2</i>      | 1311.424 | -0.66742                     | 0.14176  | -4.70814 | 2.50E-06 | 0.018336 |
| ENSG00000140006 | <i>WDR89</i>     | 150.7693 | 0.632335                     | 0.15182  | 4.165032 | 3.11E-05 | 0.114173 |
| ENSG00000184313 | <i>MROH7</i>     | 105.3837 | -0.78921                     | 0.204508 | -3.85906 | 0.000114 | 0.271157 |
| ENSG00000129757 | <i>CDKN1C</i>    | 101.3036 | 0.671943                     | 0.17645  | 3.80812  | 0.00014  | 0.271157 |
| ENSG00000173451 | <i>THAP2</i>     | 76.44963 | 0.624654                     | 0.165438 | 3.775758 | 0.00016  | 0.271157 |
| ENSG00000277117 | <i>ICOSLG</i>    | 38.58432 | 1.309042                     | 0.340901 | 3.839948 | 0.000123 | 0.271157 |
| ENSG00000127129 | <i>EDN2</i>      | 292.3299 | 2.41171                      | 0.668713 | 3.606497 | 0.00031  | 0.281593 |
| ENSG00000135045 | <i>C9orf40</i>   | 111.4209 | 0.591656                     | 0.163835 | 3.611298 | 0.000305 | 0.281593 |
| ENSG00000153485 | <i>TMEM251</i>   | 175.3835 | 0.621159                     | 0.172678 | 3.597203 | 0.000322 | 0.281593 |
| ENSG00000206172 | <i>HBA1</i>      | 21.72477 | -3.39372                     | 0.944417 | -3.59346 | 0.000326 | 0.281593 |
| ENSG00000204172 | <i>AGAP9</i>     | 156.9233 | -0.68697                     | 0.193771 | -3.54528 | 0.000392 | 0.287681 |
| ENSG00000198929 | <i>NOS1AP</i>    | 147.7733 | -0.72025                     | 0.209007 | -3.44607 | 0.000569 | 0.31136  |
| ENSG00000118508 | <i>RAB32</i>     | 180.2051 | 0.58683                      | 0.17011  | 3.449702 | 0.000561 | 0.31136  |
| ENSG00000196859 | <i>KRT39</i>     | 38.21066 | 0.952273                     | 0.274481 | 3.469356 | 0.000522 | 0.31136  |
| ENSG00000152284 | <i>TCF7L1</i>    | 33.26154 | -0.7667                      | 0.230403 | -3.32767 | 0.000876 | 0.3195   |
| ENSG00000240583 | <i>AQP1</i>      | 61.98687 | -1.05708                     | 0.322695 | -3.2758  | 0.001054 | 0.3195   |
| ENSG00000175164 | <i>ABO</i>       | 228.5686 | -0.58983                     | 0.178901 | -3.29698 | 0.000977 | 0.3195   |
| ENSG00000006327 | <i>TNFRSF12A</i> | 480.2161 | 0.932948                     | 0.2811   | 3.318923 | 0.000904 | 0.3195   |
| ENSG00000172000 | <i>ZNF556</i>    | 17.04258 | 0.87804                      | 0.266582 | 3.293689 | 0.000989 | 0.3195   |
| ENSG00000198342 | <i>ZNF442</i>    | 63.13852 | 0.754397                     | 0.227406 | 3.317401 | 0.000909 | 0.3195   |
| ENSG00000225828 | <i>FAM229A</i>   | 41.86062 | -0.5085                      | 0.156767 | -3.24367 | 0.00118  | 0.320019 |
| ENSG00000185880 | <i>TRIM69</i>    | 1353.204 | 0.629862                     | 0.194459 | 3.239051 | 0.001199 | 0.320019 |
| ENSG00000132881 | <i>RSG1</i>      | 106.1672 | 0.534104                     | 0.167607 | 3.186653 | 0.001439 | 0.338339 |
| ENSG00000221886 | <i>ZBED8</i>     | 178.3149 | 0.656915                     | 0.206286 | 3.184482 | 0.00145  | 0.338339 |
| ENSG00000163359 | <i>COL6A3</i>    | 109.9409 | -1.36855                     | 0.436338 | -3.13645 | 0.00171  | 0.349108 |
| ENSG00000122641 | <i>INHBA</i>     | 71.23154 | 1.845157                     | 0.586767 | 3.144618 | 0.001663 | 0.349108 |
| ENSG00000129474 | <i>AJUBA</i>     | 371.5591 | 0.690348                     | 0.222181 | 3.107139 | 0.001889 | 0.355797 |
| ENSG00000188290 | <i>HES4</i>      | 312.5322 | 0.669324                     | 0.224127 | 2.986357 | 0.002823 | 0.360848 |
| ENSG00000179914 | <i>ITLN1</i>     | 71.80596 | 1.857605                     | 0.620404 | 2.994186 | 0.002752 | 0.360848 |
| ENSG00000164404 | <i>GDF9</i>      | 21.44236 | 0.717419                     | 0.240885 | 2.97826  | 0.002899 | 0.360848 |
| ENSG00000036448 | <i>MYOM2</i>     | 36.698   | 0.731788                     | 0.245223 | 2.984168 | 0.002844 | 0.360848 |
| ENSG00000123411 | <i>IKZF4</i>     | 100.528  | -0.51143                     | 0.171315 | -2.98534 | 0.002833 | 0.360848 |
| ENSG00000132481 | <i>TRIM47</i>    | 188.1067 | 0.510921                     | 0.172017 | 2.970178 | 0.002976 | 0.360848 |
| ENSG00000187187 | <i>ZNF546</i>    | 84.94763 | 0.720698                     | 0.233248 | 3.089832 | 0.002003 | 0.360848 |
| ENSG00000159885 | <i>ZNF222</i>    | 88.79954 | 0.594934                     | 0.200539 | 2.966677 | 0.00301  | 0.360848 |
| ENSG00000261221 | <i>ZNF865</i>    | 88.98932 | -0.55707                     | 0.187852 | -2.96546 | 0.003022 | 0.360848 |
| ENSG00000132801 | <i>ZSWIM3</i>    | 109.449  | 0.520946                     | 0.174892 | 2.978677 | 0.002895 | 0.360848 |
| ENSG00000177854 | <i>TMEM187</i>   | 153.3936 | 0.525238                     | 0.17367  | 3.024343 | 0.002492 | 0.360848 |
| ENSG00000278705 | <i>HIST1H4B</i>  | 594.7796 | 0.677645                     | 0.231015 | 2.933342 | 0.003353 | 0.369876 |
| ENSG00000203724 | <i>C1orf53</i>   | 43.69044 | 0.605087                     | 0.208161 | 2.906826 | 0.003651 | 0.374903 |

|                 |                   |          |          |          |          |          |          |
|-----------------|-------------------|----------|----------|----------|----------|----------|----------|
| ENSG00000232040 | <i>ZBED9</i>      | 37.2166  | 0.83489  | 0.285474 | 2.924569 | 0.003449 | 0.374903 |
| ENSG00000104267 | <i>CA2</i>        | 209.3763 | 0.919822 | 0.315283 | 2.917449 | 0.003529 | 0.374903 |
| ENSG00000122254 | <i>HS3ST2</i>     | 22.89722 | 1.033907 | 0.354774 | 2.914269 | 0.003565 | 0.374903 |
| ENSG00000177606 | <i>JUN</i>        | 1569.743 | 0.662493 | 0.234252 | 2.828126 | 0.004682 | 0.384771 |
| ENSG00000164082 | <i>GRM2</i>       | 20.58784 | -0.7129  | 0.250317 | -2.84799 | 0.0044   | 0.384771 |
| ENSG00000163536 | <i>SERPINI1</i>   | 52.52468 | 0.54397  | 0.196048 | 2.774681 | 0.005526 | 0.384771 |
| ENSG00000019991 | <i>HGF</i>        | 57.15752 | 0.646882 | 0.228819 | 2.827044 | 0.004698 | 0.384771 |
| ENSG00000090266 | <i>NDUFB2</i>     | 674.9224 | 0.514751 | 0.180961 | 2.844548 | 0.004447 | 0.384771 |
| ENSG00000255823 | <i>MTRNR2L8</i>   | 88.69851 | 0.80221  | 0.284671 | 2.818019 | 0.004832 | 0.384771 |
| ENSG00000135094 | <i>SDS</i>        | 374.6442 | 0.833066 | 0.295145 | 2.82257  | 0.004764 | 0.384771 |
| ENSG00000175985 | <i>PLEKHD1</i>    | 84.74293 | -0.67052 | 0.240603 | -2.78682 | 0.005323 | 0.384771 |
| ENSG00000108821 | <i>COLIA1</i>     | 144.2349 | -0.83705 | 0.296719 | -2.82103 | 0.004787 | 0.384771 |
| ENSG00000261857 | <i>MIA</i>        | 203.7857 | 0.827884 | 0.292163 | 2.833632 | 0.004602 | 0.384771 |
| ENSG00000142530 | <i>FAM71E1</i>    | 19.35397 | 0.555792 | 0.197434 | 2.815074 | 0.004877 | 0.384771 |
| ENSG00000170775 | <i>GPR37</i>      | 104.9986 | 0.566107 | 0.206773 | 2.737821 | 0.006185 | 0.389828 |
| ENSG00000197019 | <i>SERTAD1</i>    | 621.5665 | 0.515149 | 0.188775 | 2.728909 | 0.006354 | 0.391678 |
| ENSG00000078401 | <i>EDN1</i>       | 78.41643 | 1.222486 | 0.448687 | 2.724583 | 0.006438 | 0.392048 |
| ENSG00000040608 | <i>RTN4R</i>      | 19.66314 | 0.599538 | 0.220824 | 2.715001 | 0.006628 | 0.392048 |
| ENSG00000113209 | <i>PCDHB5</i>     | 15.93101 | 0.681644 | 0.252213 | 2.702646 | 0.006879 | 0.393004 |
| ENSG00000196345 | <i>ZKSCAN7</i>    | 91.34475 | 0.52829  | 0.195666 | 2.699956 | 0.006935 | 0.393055 |
| ENSG00000165917 | <i>RAPSN</i>      | 21.05145 | -0.63449 | 0.236171 | -2.68658 | 0.007219 | 0.400593 |
| ENSG00000145632 | <i>PLK2</i>       | 1570.018 | 0.505878 | 0.18918  | 2.67406  | 0.007494 | 0.401224 |
| ENSG00000198939 | <i>ZFP2</i>       | 25.53408 | 0.761238 | 0.284628 | 2.674505 | 0.007484 | 0.401224 |
| ENSG00000186480 | <i>INSIG1</i>     | 1680.1   | 0.590828 | 0.220892 | 2.674736 | 0.007479 | 0.401224 |
| ENSG00000198670 | <i>LPA</i>        | 68.50585 | -0.60768 | 0.227745 | -2.66823 | 0.007625 | 0.40529  |
| ENSG00000214756 | <i>METTL12</i>    | 90.15136 | 0.507306 | 0.190443 | 2.663816 | 0.007726 | 0.407007 |
| ENSG00000149243 | <i>KLHL35</i>     | 30.62397 | 0.540832 | 0.203969 | 2.651538 | 0.008013 | 0.407759 |
| ENSG00000239282 | <i>GATSL3</i>     | 163.1875 | 0.518584 | 0.195348 | 2.65467  | 0.007939 | 0.407759 |
| ENSG00000088538 | <i>DOCK3</i>      | 53.29586 | -0.54609 | 0.207448 | -2.6324  | 0.008478 | 0.414453 |
| ENSG00000241360 | <i>PDXP</i>       | 67.81247 | 0.52209  | 0.19822  | 2.633894 | 0.008441 | 0.414453 |
| ENSG00000242866 | <i>STRC</i>       | 49.76977 | -0.67549 | 0.257248 | -2.62583 | 0.008644 | 0.418498 |
| ENSG00000162772 | <i>ATF3</i>       | 603.2502 | 0.697791 | 0.268797 | 2.595975 | 0.009432 | 0.420723 |
| ENSG00000187094 | <i>CCK</i>        | 60.47584 | 0.800681 | 0.309839 | 2.584187 | 0.009761 | 0.420723 |
| ENSG00000198785 | <i>GRIN3A</i>     | 14.96359 | 1.201367 | 0.460333 | 2.60978  | 0.00906  | 0.420723 |
| ENSG00000187720 | <i>THSD4</i>      | 175.5152 | -0.56348 | 0.218724 | -2.57622 | 0.009989 | 0.420723 |
| ENSG00000280006 | <i>AC009060.2</i> | 90.4094  | -0.81421 | 0.315713 | -2.57896 | 0.00991  | 0.420723 |

Table S8: Biological Processes Enriched in “Cold” group (d0 vs d3)

| ID         | Description                                | Gene Ratio | BgRatio   | Pvalue   | P.adjust | Qvalue   | geneID                                               | Count |
|------------|--------------------------------------------|------------|-----------|----------|----------|----------|------------------------------------------------------|-------|
| GO:0044057 | Regulation of system process               | 0.148      | 0.0295106 | 6.99E-05 | 2.16E-02 | 1.75E-02 | <i>EDN2/NOS1AP/PER2/CCK/GDF9/EDN1/AQP1/INHBA/HGF</i> | 9     |
| GO:0010035 | Response to inorganic substance            | 0.131      | 0.0272913 | 2.40E-04 | 3.67E-02 | 2.97E-02 | <i>JUN/EDN1/AQP1/HGF/GPR37/CA2/HBA1/COL1A1</i>       | 8     |
| GO:0042326 | Negative regulation of phosphorylation     | 0.131      | 0.0248321 | 1.26E-04 | 3.33E-02 | 2.69E-02 | <i>JUN/ATF3/INHBA/HGF/CDKN1C/AJUBA/BMP4/RIN4R</i>    | 8     |
| GO:0015711 | Organic anion transport                    | 0.115      | 0.0190139 | 1.52E-04 | 3.53E-02 | 2.85E-02 | <i>PER2/CCK/GRM2/EDN1/AQP1/CA2/HBA1</i>              | 7     |
| GO:0000302 | Response to reactive oxygen species        | 0.115      | 0.0122961 | 9.54E-06 | 5.89E-03 | 4.76E-03 | <i>JUN/EDN1/AQP1/HGF/GPR37/HBA1/COL1A1</i>           | 7     |
| GO:0042542 | Response to hydrogen peroxide              | 0.098      | 0.0071377 | 4.70E-06 | 4.35E-03 | 3.52E-03 | <i>JUN/AQP1/HGF/GPR37/HBA1/COL1A1</i>                | 6     |
| GO:0042476 | Odontogenesis                              | 0.098      | 0.0068378 | 3.66E-06 | 4.35E-03 | 3.52E-03 | <i>EDN1/AQP1/INHBA/CA2/BMP4/COL1A1</i>               | 6     |
| GO:2001236 | Regulation of extrinsic signalling pathway | 0.082      | 0.009237  | 2.47E-04 | 3.67E-02 | 2.97E-02 | <i>ATF3/INHBA/HGF/BMP4/TNFRSF12A</i>                 | 5     |
| GO:0044070 | Regulation of anion transport              | 0.066      | 0.0050384 | 2.51E-04 | 3.67E-02 | 2.97E-02 | <i>PER2/CCK/EDN1/CA2</i>                             | 4     |
| GO:0050886 | Endocrine process                          | 0.066      | 0.0046785 | 1.89E-04 | 3.67E-02 | 2.97E-02 | <i>EDN2/GDF9/EDN1/INHBA</i>                          | 4     |
| GO:0060395 | SMAD protein signal transduction           | 0.066      | 0.0034789 | 5.94E-05 | 2.16E-02 | 1.75E-02 | <i>JUN/GDF9/INHBA/BMP4</i>                           | 4     |
| GO:0015669 | Gas transport                              | 0.049      | 0.0011396 | 4.33E-05 | 2.01E-02 | 1.62E-02 | <i>AQP1/CA2/HBA1</i>                                 | 3     |

Table S9: Biological Processes Enriched in “No Cold” group (d0 vs d3)

| ID         | Description                                   | Gene Ratio | BgRatio  | Pvalue   | P.adjust | Qvalue   | geneID                                                | Count |
|------------|-----------------------------------------------|------------|----------|----------|----------|----------|-------------------------------------------------------|-------|
| GO:0008544 | Epidermis development                         | 0.116      | 0.017694 | 2.87E-05 | 5.48E-03 | 4.73E-03 | <i>CRCT1/S100A7/SPINK5/MSX2/CTSV/DKK1/CNFN/CLK7</i>   | 8     |
| GO:0043588 | Skin development                              | 0.116      | 0.014335 | 6.24E-06 | 2.09E-03 | 1.80E-03 | <i>CRCT1/S100A7/SPINK5/MSX2/CTSV/DKK1/ATP8A2/CNFN</i> | 8     |
| GO:0042742 | Defense response to bacterium                 | 0.101      | 0.015055 | 7.86E-05 | 8.76E-03 | 7.57E-03 | <i>S100A7/JCHAIN/CXCL6/SPINK5/MUC5B/RNASE7/CLK7</i>   | 7     |
| GO:0002687 | Positive regulation of leukocyte migration    | 0.072      | 0.006358 | 7.69E-05 | 8.76E-03 | 7.57E-03 | <i>S100A7/CXCL6/CXCL1/CXCL3/CXCL2</i>                 | 5     |
| GO:0002688 | Regulation of leukocyte chemotaxis            | 0.072      | 0.005638 | 4.33E-05 | 6.77E-03 | 5.85E-03 | <i>S100A7/CXCL6/CXCL1/CXCL3/CXCL2</i>                 | 5     |
| GO:0002690 | Positive regulation of leukocyte chemotaxis   | 0.072      | 0.004679 | 1.75E-05 | 3.90E-03 | 3.37E-03 | <i>S100A7/CXCL6/CXCL1/CXCL3/CXCL2</i>                 | 5     |
| GO:0019730 | Antimicrobial humoral response                | 0.058      | 0.003239 | 7.27E-05 | 8.76E-03 | 7.57E-03 | <i>JCHAIN/SPINK5/RNASE7/CLK7</i>                      | 4     |
| GO:0019731 | Antibacterial humoral response                | 0.058      | 0.002879 | 4.56E-05 | 6.77E-03 | 5.85E-03 | <i>JCHAIN/SPINK5/RNASE7/CLK7</i>                      | 4     |
| GO:0071622 | Regulation of granulocyte chemotaxis          | 0.058      | 0.002219 | 1.60E-05 | 3.90E-03 | 3.37E-03 | <i>S100A7/CXCL1/CXCL3/CXCL2</i>                       | 4     |
| GO:0001893 | Maternal placenta development                 | 0.058      | 0.001739 | 5.90E-06 | 2.09E-03 | 1.80E-03 | <i>SPP1/CTSV/GJB2/LIF</i>                             | 4     |
| GO:0071624 | Positive regulation of granulocyte chemotaxis | 0.058      | 0.0015   | 3.18E-06 | 2.09E-03 | 1.80E-03 | <i>S100A7/CXCL1/CXCL3/CXCL2</i>                       | 4     |
| GO:0046697 | Decidualization                               | 0.058      | 0.00114  | 9.94E-07 | 1.33E-03 | 1.15E-03 | <i>SPP1/CTSV/GJB2/LIF</i>                             | 4     |

Table S10: Molecular Functions Enriched in “No Cold” group (d0 vs d3)

| ID         | Description                                  | GeneRatio | BgRatio  | Pvalue   | P.adjust | qvalue   | geneID                                                   | Count |
|------------|----------------------------------------------|-----------|----------|----------|----------|----------|----------------------------------------------------------|-------|
| GO:0030545 | receptor regulator activity                  | 0.114     | 0.027947 | 7.26E-04 | 1.11E-02 | 9.74E-03 | <i>CXCL6/CXCL1/CXCL3/CXCL2/SPP1/HBEGF/DKK1/LIF</i>       | 8     |
| GO:0004175 | endopeptidase activity                       | 0.114     | 0.027025 | 5.83E-04 | 9.80E-03 | 8.58E-03 | <i>TMPRSS11B/PLAT/CTSV/TPSB2/KLK7/KLK8/KLK12/ADAMTS1</i> | 8     |
| GO:0048018 | receptor ligand activity                     | 0.114     | 0.026276 | 4.84E-04 | 9.80E-03 | 8.58E-03 | <i>CXCL6/CXCL1/CXCL3/CXCL2/SPP1/HBEGF/DKK1/LIF</i>       | 8     |
| GO:0017171 | serine hydrolase activity                    | 0.100     | 0.015962 | 1.24E-04 | 3.81E-03 | 3.34E-03 | <i>TMPRSS11B/PLAT/CTSV/TPSB2/KLK7/KLK8/KLK12</i>         | 7     |
| GO:0008236 | serine-type peptidase activity               | 0.100     | 0.015674 | 1.11E-04 | 3.81E-03 | 3.34E-03 | <i>TMPRSS11B/PLAT/CTSV/TPSB2/KLK7/KLK8/KLK12</i>         | 7     |
| GO:0004252 | serine-type endopeptidase activity           | 0.100     | 0.01406  | 5.62E-05 | 3.45E-03 | 3.02E-03 | <i>TMPRSS11B/PLAT/CTSV/TPSB2/KLK7/KLK8/KLK12</i>         | 7     |
| GO:0005125 | cytokine activity                            | 0.086     | 0.012677 | 2.59E-04 | 5.95E-03 | 5.21E-03 | <i>CXCL6/CXCL1/CXCL3/CXCL2/SPP1/LIF</i>                  | 6     |
| GO:0005539 | glycosaminoglycan binding                    | 0.086     | 0.012274 | 2.17E-04 | 5.71E-03 | 5.00E-03 | <i>SERPINE2/JCHAIN/CXCL6/HBEGF/RNASE7/ADAMTS1</i>        | 6     |
| GO:0004867 | serine-type endopeptidase inhibitor activity | 0.057     | 0.005474 | 5.86E-04 | 9.80E-03 | 8.58E-03 | <i>SERPINE2/SPINK5/SPINK7/ITIH6</i>                      | 4     |
| GO:0042379 | chemokine receptor binding                   | 0.057     | 0.003457 | 9.98E-05 | 3.81E-03 | 3.34E-03 | <i>CXCL6/CXCL1/CXCL3/CXCL2</i>                           | 4     |
| GO:0008009 | chemokine activity                           | 0.057     | 0.002766 | 4.13E-05 | 3.45E-03 | 3.02E-03 | <i>CXCL6/CXCL1/CXCL3/CXCL2</i>                           | 4     |
| GO:0045236 | CXCR chemokine receptor binding              | 0.057     | 0.000922 | 4.26E-07 | 7.84E-05 | 6.86E-05 | <i>CXCL6/CXCL1/CXCL3/CXCL2</i>                           | 4     |
| GO:0042834 | peptidoglycan binding                        | 0.029     | 0.000807 | 1.41E-03 | 2.00E-02 | 1.75E-02 | <i>JCHAIN/RNASE7</i>                                     | 2     |

Table S11: KEGG Pathways Enriched in “No Cold” group (d0 vs d3)

| ID       | Description                                                | GeneRatio | BgRatio  | Pvalue   | P.adjust | qvalue   | geneSymbol                                      | Count |
|----------|------------------------------------------------------------|-----------|----------|----------|----------|----------|-------------------------------------------------|-------|
| hsa04657 | IL-17 signaling pathway                                    | 0.226     | 0.012515 | 7.88E-08 | 7.25E-06 | 6.14E-06 | <i>JUN/S100A7/CXCL6/CXCL1/CXCL3/CXCL2/MUC5B</i> | 7     |
| hsa04060 | Cytokine-cytokine receptor interaction                     | 0.194     | 0.039564 | 1.16E-03 | 2.67E-02 | 2.26E-02 | <i>IL1RL1/CXCL6/CXCL1/CXCL3/CXCL2/LIF</i>       | 6     |
| hsa04668 | TNF signaling pathway                                      | 0.161     | 0.014803 | 8.11E-05 | 3.73E-03 | 3.16E-03 | <i>JUN/CXCL1/CXCL3/CXCL2/LIF</i>                | 5     |
| hsa05132 | Salmonella infection                                       | 0.129     | 0.011573 | 4.15E-04 | 1.27E-02 | 1.08E-02 | <i>JUN/CXCL1/CXCL3/CXCL2</i>                    | 4     |
| hsa05120 | Epithelial cell signaling in Helicobacter pylori infection | 0.097     | 0.009151 | 2.74E-03 | 4.21E-02 | 3.56E-02 | <i>JUN/CXCL1/HBEGF</i>                          | 3     |
| hsa05134 | Legionellosis                                              | 0.097     | 0.007401 | 1.49E-03 | 2.74E-02 | 2.32E-02 | <i>CXCL1/CXCL3/CXCL2</i>                        | 3     |

Table S12: Molecular Functions enriched in the WGCNA “Brown” module

| ID         | Description                        | GeneRatio | BgRatio  | Pvalue   | P.adjust | qvalue   | geneID                           | Count |
|------------|------------------------------------|-----------|----------|----------|----------|----------|----------------------------------|-------|
| GO:0004175 | endopeptidase activity             | 0.29      | 0.027025 | 4.25E-04 | 3.72E-03 | 2.80E-03 | <i>TMPRSS11B/KLK7/KLK8/KLK12</i> | 4     |
| GO:0017171 | serine hydrolase activity          | 0.29      | 0.015962 | 5.60E-05 | 6.54E-04 | 4.92E-04 | <i>TMPRSS11B/KLK7/KLK8/KLK12</i> | 4     |
| GO:0008236 | serine-type peptidase activity     | 0.29      | 0.015674 | 5.22E-05 | 6.54E-04 | 4.92E-04 | <i>TMPRSS11B/KLK7/KLK8/KLK12</i> | 4     |
| GO:0004252 | serine-type endopeptidase activity | 0.29      | 0.01406  | 3.42E-05 | 6.54E-04 | 4.92E-04 | <i>TMPRSS11B/KLK7/KLK8/KLK12</i> | 4     |

Table S13: Molecular Functions enriched in the WGCNA “Turquoise” module

| ID         | Description                                  | GeneRatio | BgRatio   | Pvalue   | P.adjust | qvalue   | geneID                        | Count |
|------------|----------------------------------------------|-----------|-----------|----------|----------|----------|-------------------------------|-------|
| GO:1901681 | sulfur compound binding                      | 0.15      | 0.0133687 | 2.27E-03 | 2.36E-02 | 1.64E-02 | <i>SERPINE2/HBEGF/ADAMTS1</i> | 3     |
| GO:0061134 | peptidase regulator activity                 | 0.15      | 0.0125619 | 1.90E-03 | 2.26E-02 | 1.57E-02 | <i>SERPINE2/SPINK5/ITIH6</i>  | 3     |
| GO:0005539 | glycosaminoglycan binding                    | 0.15      | 0.0122738 | 1.78E-03 | 2.26E-02 | 1.57E-02 | <i>SERPINE2/HBEGF/ADAMTS1</i> | 3     |
| GO:0030414 | peptidase inhibitor activity                 | 0.15      | 0.0104875 | 1.13E-03 | 1.88E-02 | 1.31E-02 | <i>SERPINE2/SPINK5/ITIH6</i>  | 3     |
| GO:0061135 | endopeptidase regulator activity             | 0.15      | 0.0103146 | 1.08E-03 | 1.88E-02 | 1.31E-02 | <i>SERPINE2/SPINK5/ITIH6</i>  | 3     |
| GO:0004866 | endopeptidase inhibitor activity             | 0.15      | 0.0099689 | 9.80E-04 | 1.88E-02 | 1.31E-02 | <i>SERPINE2/SPINK5/ITIH6</i>  | 3     |
| GO:0008201 | heparin binding                              | 0.15      | 0.0092198 | 7.81E-04 | 1.88E-02 | 1.31E-02 | <i>SERPINE2/HBEGF/ADAMTS1</i> | 3     |
| GO:0004867 | serine-type endopeptidase inhibitor activity | 0.15      | 0.0054742 | 1.69E-04 | 1.41E-02 | 9.80E-03 | <i>SERPINE2/SPINK5/ITIH6</i>  | 3     |

Table S14: Molecular Functions enriched in the WGCNA “Blue” module

| ID         | Description                                                                                  | GeneRatio | BgRatio  | Pvalue   | P.adjust | qvalue   | geneID                                  | Count |
|------------|----------------------------------------------------------------------------------------------|-----------|----------|----------|----------|----------|-----------------------------------------|-------|
| GO:0030545 | receptor regulator activity                                                                  | 0.43      | 0.027947 | 1.15E-06 | 1.17E-05 | 4.63E-06 | <i>CXCL6/CXCL1/CXCL3/CXCL2/SPP1/LIF</i> | 6     |
| GO:0048018 | receptor ligand activity                                                                     | 0.43      | 0.026276 | 8.00E-07 | 9.76E-06 | 3.87E-06 | <i>CXCL6/CXCL1/CXCL3/CXCL2/SPP1/LIF</i> | 6     |
| GO:0005125 | cytokine activity                                                                            | 0.43      | 0.012677 | 1.07E-08 | 3.26E-07 | 1.30E-07 | <i>CXCL6/CXCL1/CXCL3/CXCL2/SPP1/LIF</i> | 6     |
| GO:0005126 | cytokine receptor binding                                                                    | 0.36      | 0.015443 | 1.51E-06 | 1.32E-05 | 5.23E-06 | <i>CXCL6/CXCL1/CXCL3/CXCL2/LIF</i>      | 5     |
| GO:0001228 | transcriptional activator activity, RNA polymerase II transcription regulatory region        | 0.29      | 0.023683 | 2.57E-04 | 1.74E-03 | 6.91E-04 | <i>JUN/EGRI/KLF6/SPIB</i>               | 4     |
| GO:0001664 | G-protein coupled receptor binding                                                           | 0.29      | 0.015097 | 4.51E-05 | 3.44E-04 | 1.37E-04 | <i>CXCL6/CXCL1/CXCL3/CXCL2</i>          | 4     |
| GO:0042379 | chemokine receptor binding                                                                   | 0.29      | 0.003457 | 1.26E-07 | 1.92E-06 | 7.62E-07 | <i>CXCL6/CXCL1/CXCL3/CXCL2</i>          | 4     |
| GO:0008009 | chemokine activity                                                                           | 0.29      | 0.002766 | 5.05E-08 | 1.03E-06 | 4.08E-07 | <i>CXCL6/CXCL1/CXCL3/CXCL2</i>          | 4     |
| GO:0045236 | CXCR chemokine receptor binding                                                              | 0.29      | 0.000922 | 4.80E-10 | 2.93E-08 | 1.16E-08 | <i>CXCL6/CXCL1/CXCL3/CXCL2</i>          | 4     |
| GO:0000982 | transcriptional activator activity, RNA polymerase II core promoter proximal region sequence | 0.21      | 0.023049 | 3.66E-03 | 1.49E-02 | 5.91E-03 | <i>JUN/EGRI/KLF6</i>                    | 3     |
| GO:0001158 | enhancer sequence-specific DNA binding                                                       | 0.14      | 0.005301 | 2.43E-03 | 1.23E-02 | 4.90E-03 | <i>JUN/SPIB</i>                         | 2     |
| GO:0000980 | RNA polymerase II distal enhancer sequence-specific DNA binding                              | 0.14      | 0.004149 | 1.50E-03 | 8.29E-03 | 3.29E-03 | <i>JUN/SPIB</i>                         | 2     |
| GO:0070412 | R-SMAD binding                                                                               | 0.07      | 0.001325 | 1.84E-02 | 4.68E-02 | 1.86E-02 | <i>JUN</i>                              | 1     |
| GO:0001965 | G-protein alpha-subunit binding                                                              | 0.07      | 0.001095 | 1.52E-02 | 4.04E-02 | 1.60E-02 | <i>RGS1</i>                             | 1     |
| GO:0071837 | HMG box domain binding                                                                       | 0.07      | 0.001037 | 1.44E-02 | 4.00E-02 | 1.59E-02 | <i>JUN</i>                              | 1     |
| GO:0001134 | transcription factor activity, transcription factor recruiting                               | 0.07      | 0.000807 | 1.12E-02 | 3.26E-02 | 1.30E-02 | <i>LIF</i>                              | 1     |
| GO:0033549 | MAP kinase phosphatase activity                                                              | 0.07      | 0.000807 | 1.12E-02 | 3.26E-02 | 1.30E-02 | <i>DUSP6</i>                            | 1     |
| GO:0017017 | MAP kinase tyrosine/serine/threonine phosphatase activity                                    | 0.07      | 0.000749 | 1.04E-02 | 3.26E-02 | 1.30E-02 | <i>DUSP6</i>                            | 1     |
| GO:0035497 | cAMP response element binding                                                                | 0.07      | 0.000749 | 1.04E-02 | 3.26E-02 | 1.30E-02 | <i>JUN</i>                              | 1     |
